# Supplementary material for: Kiamycin, a Unique Cytotoxic Angucyclinone Derivative from a Marine Streptomyces sp
Source: MDPI journal article supplement (doi:10.3390/md10030551), 2012-02-27
Supplement: s1 [file s1]

Laa

Name Xie, Zeping Abteilung Laa Telefon 6235 Datum 05.07.17

Bezeichnung der Substanz: ZX047

Schmelzpunkt bzw. Siedepunkt: CDCl<sub>3</sub>

Lösungsmittel:

Empfindlich gegen:

Summenformel:

Molekulargewicht:

**Exakte Masse**  
Achtung! Massenfeinbestimmungen sagen nichts über die  
Reinheit einer Verbindung aus!

Vermutliche Struktur: Natural product

Syntheseweg:

$$[M+Na]^+ = 345.1$$

$$[2M+Na]^+ = 667.3$$

$$[M-H]^- = 321.1$$

$$[2M-H]^- = 643.2$$

Umkristallisiert aus:

Sonstige Verunreinigungen:

Rückgewinnung der Substanz (ja – nein):

Elementaranalyse vorhanden (ja – nein); Begründung, wenn nicht vorhanden:

Bereits vorliegende spektroskopische Befunde:

Aufgabenstellung:

| EI | ESI | DCI | MALDI | FAB | APCI* | GC-MS* | LC-MS* | HR-MS | MS/MS* |
|----|-----|-----|-------|-----|-------|--------|--------|-------|--------|
|    | X   |     |       |     |       |        |        | X     |        |

\* nach Absprache

# Display Report

## Analysis Info

Analysis Name Z:\Data\2011\1107Jul\sam070711\ZX047 low\_18\_01\_35752.d  
Method fiamsauto\_pos\_lowlow.m  
Sample Name ZX047 low  
Comment

Acquisition Date 06.07.2011 23:01:57  
Operator BDAL@DE  
Instrument / Ser# micrOTOF 10237

## Acquisition Parameter

|             |            |                      |          |                  |           |
|-------------|------------|----------------------|----------|------------------|-----------|
| Source Type | ESI        | Ion Polarity         | Positive | Set Nebulizer    | 1.6 Bar   |
| Focus       | Not active |                      |          | Set Dry Heater   | 180 °C    |
| Scan Begin  | 50 m/z     | Set Capillary        | 4500 V   | Set Dry Gas      | 8.0 l/min |
| Scan End    | 1600 m/z   | Set End Plate Offset | -500 V   | Set Divert Valve | Source    |

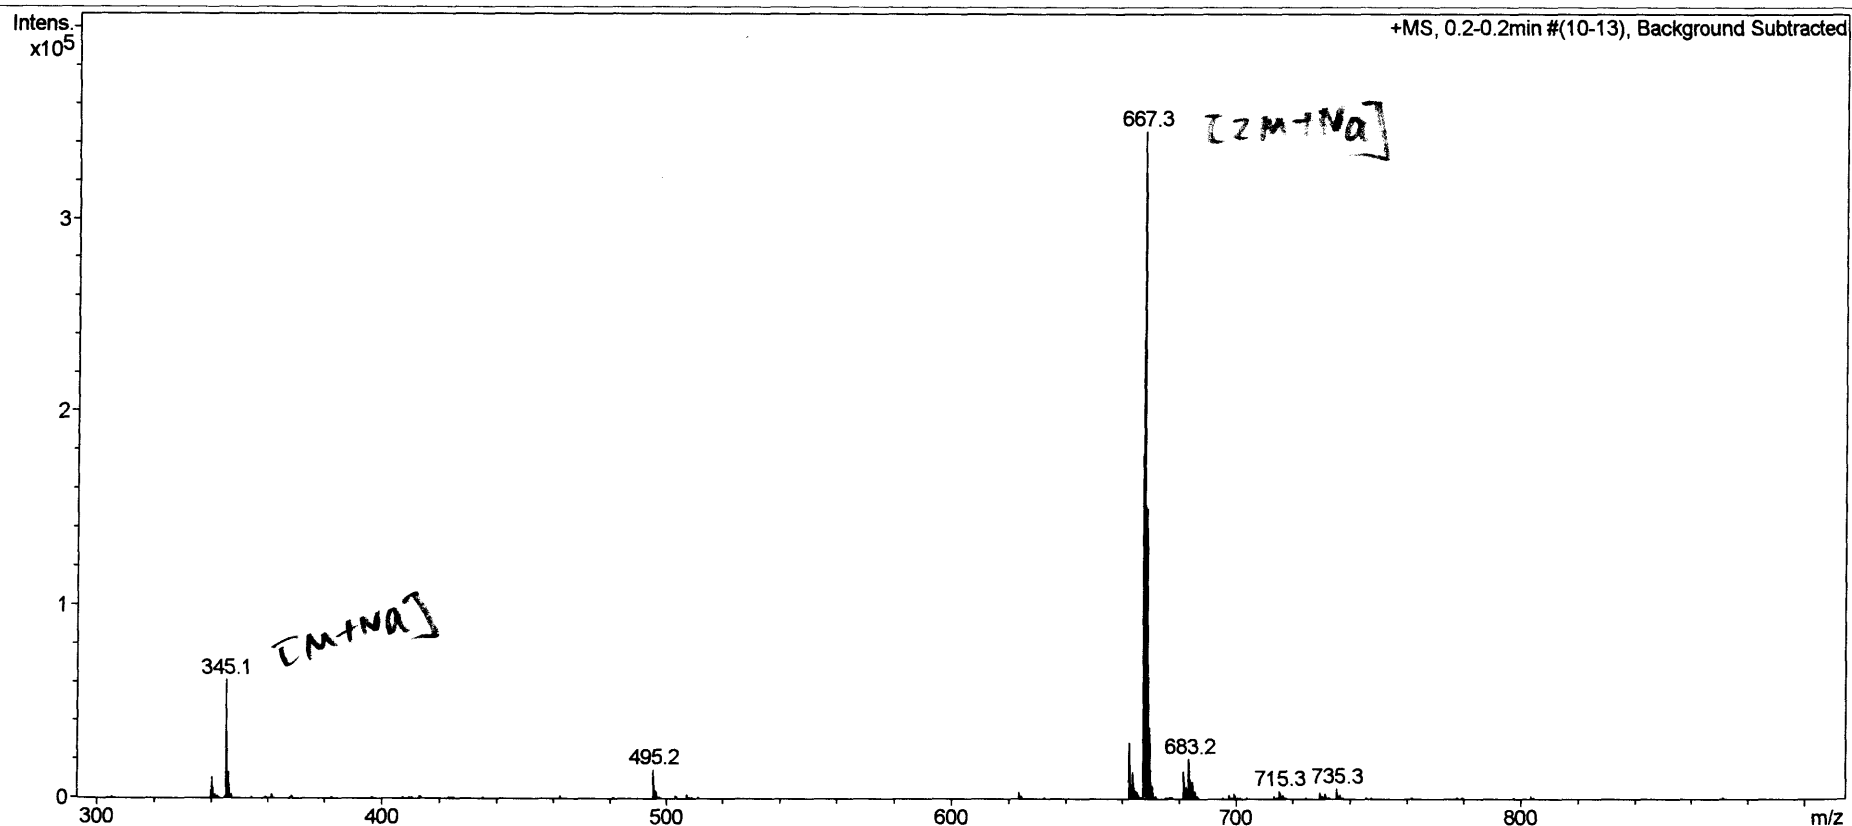

# Mass Spectrum SmartFormula Report

## Analysis Info

Analysis Name Z:\Data\2011\1107Jul\Sam070711\ZX047 low\_18\_01\_35752.d  
 Method fiamsauto\_pos\_lowlow.m  
 Sample Name ZX047 low  
 Comment

Acquisition Date 06.07.2011 23:01:57  
 Operator BDAL@DE  
 Instrument / Ser# micrOTOF 10237

## Acquisition Parameter

|             |            |                      |          |                  |           |
|-------------|------------|----------------------|----------|------------------|-----------|
| Source Type | ESI        | Ion Polarity         | Positive | Set Nebulizer    | 1.6 Bar   |
| Focus       | Not active |                      |          | Set Dry Heater   | 180 °C    |
| Scan Begin  | 50 m/z     | Set Capillary        | 4500 V   | Set Dry Gas      | 8.0 l/min |
| Scan End    | 1600 m/z   | Set End Plate Offset | -500 V   | Set Divert Valve | Source    |

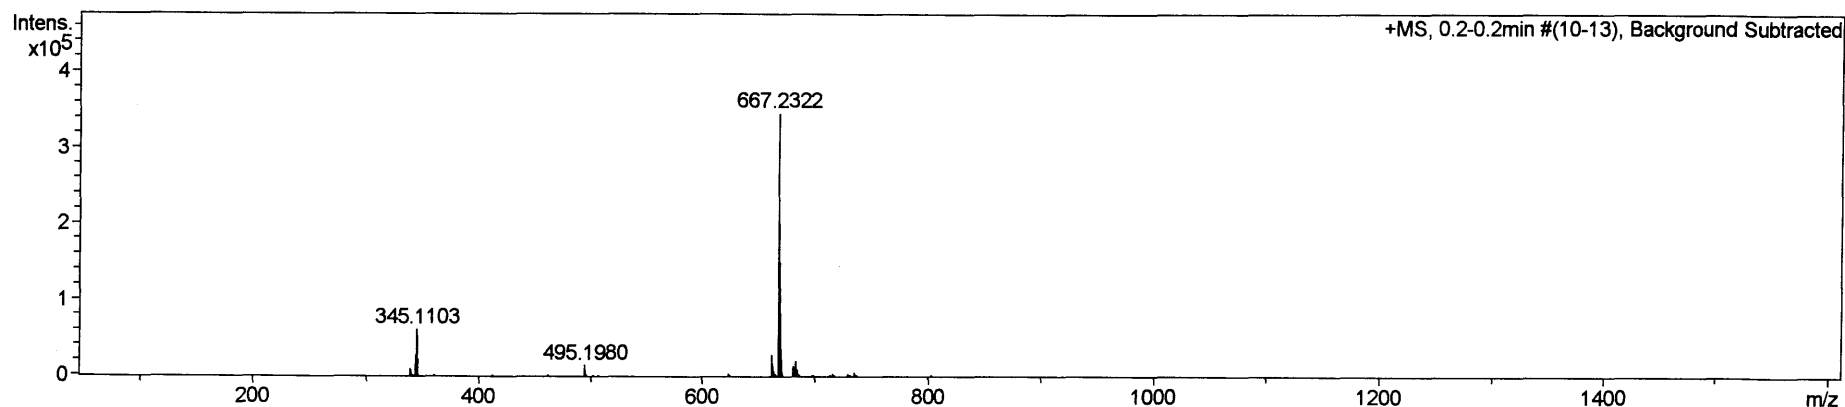

| Meas. m/z | # | Formula              | m/z      | err [ppm] | Mean err [ppm] | rdb  | N-R | e <sup>-</sup> | mSigma | Std I  | Std Mean m/z | Std I VarNorm | Std m/z Diff | Std Comb Dev |
|-----------|---|----------------------|----------|-----------|----------------|------|-----|----------------|--------|--------|--------------|---------------|--------------|--------------|
| 345.1103  | 1 | C 20 H 18 Na O 4     | 345.1097 | -1.6      | -1.3           | 11.5 | ok  | even           | 4.08   | 0.0069 | 0.0005       | 0.0029        | 0.0005       | 0.6676       |
|           | 2 | C 21 H 14 N 4 Na     | 345.1111 | 2.3       | 2.5            | 16.5 | ok  | even           | 11.00  | 0.0160 | 0.0009       | 0.0073        | 0.0004       | 0.8427       |
|           | 3 | C 16 H 14 N 6 Na O 2 | 345.1070 | -9.4      | -9.1           | 12.5 | ok  | even           | 17.15  | 0.0312 | 0.0032       | 0.0129        | 0.0004       | 0.9768       |

ZX047 cdc13  
Xie / Laatsch / EP

Jun 30 2011

INSTRUMENT: MERCURY-300

PROBE atb

OBSERVE H1

Frequency 300.140 MHz

Spectral width 5109.9 Hz

Acquisition time 3.128 sec

Relaxation delay 0.000 sec

Pulse 45.0 degrees

Ambient temperature

32 repetitions

Gated decoupling

Double precision acquisition

DATA PROCESSING

FT size 65536

Total acquisition time 1 minutes

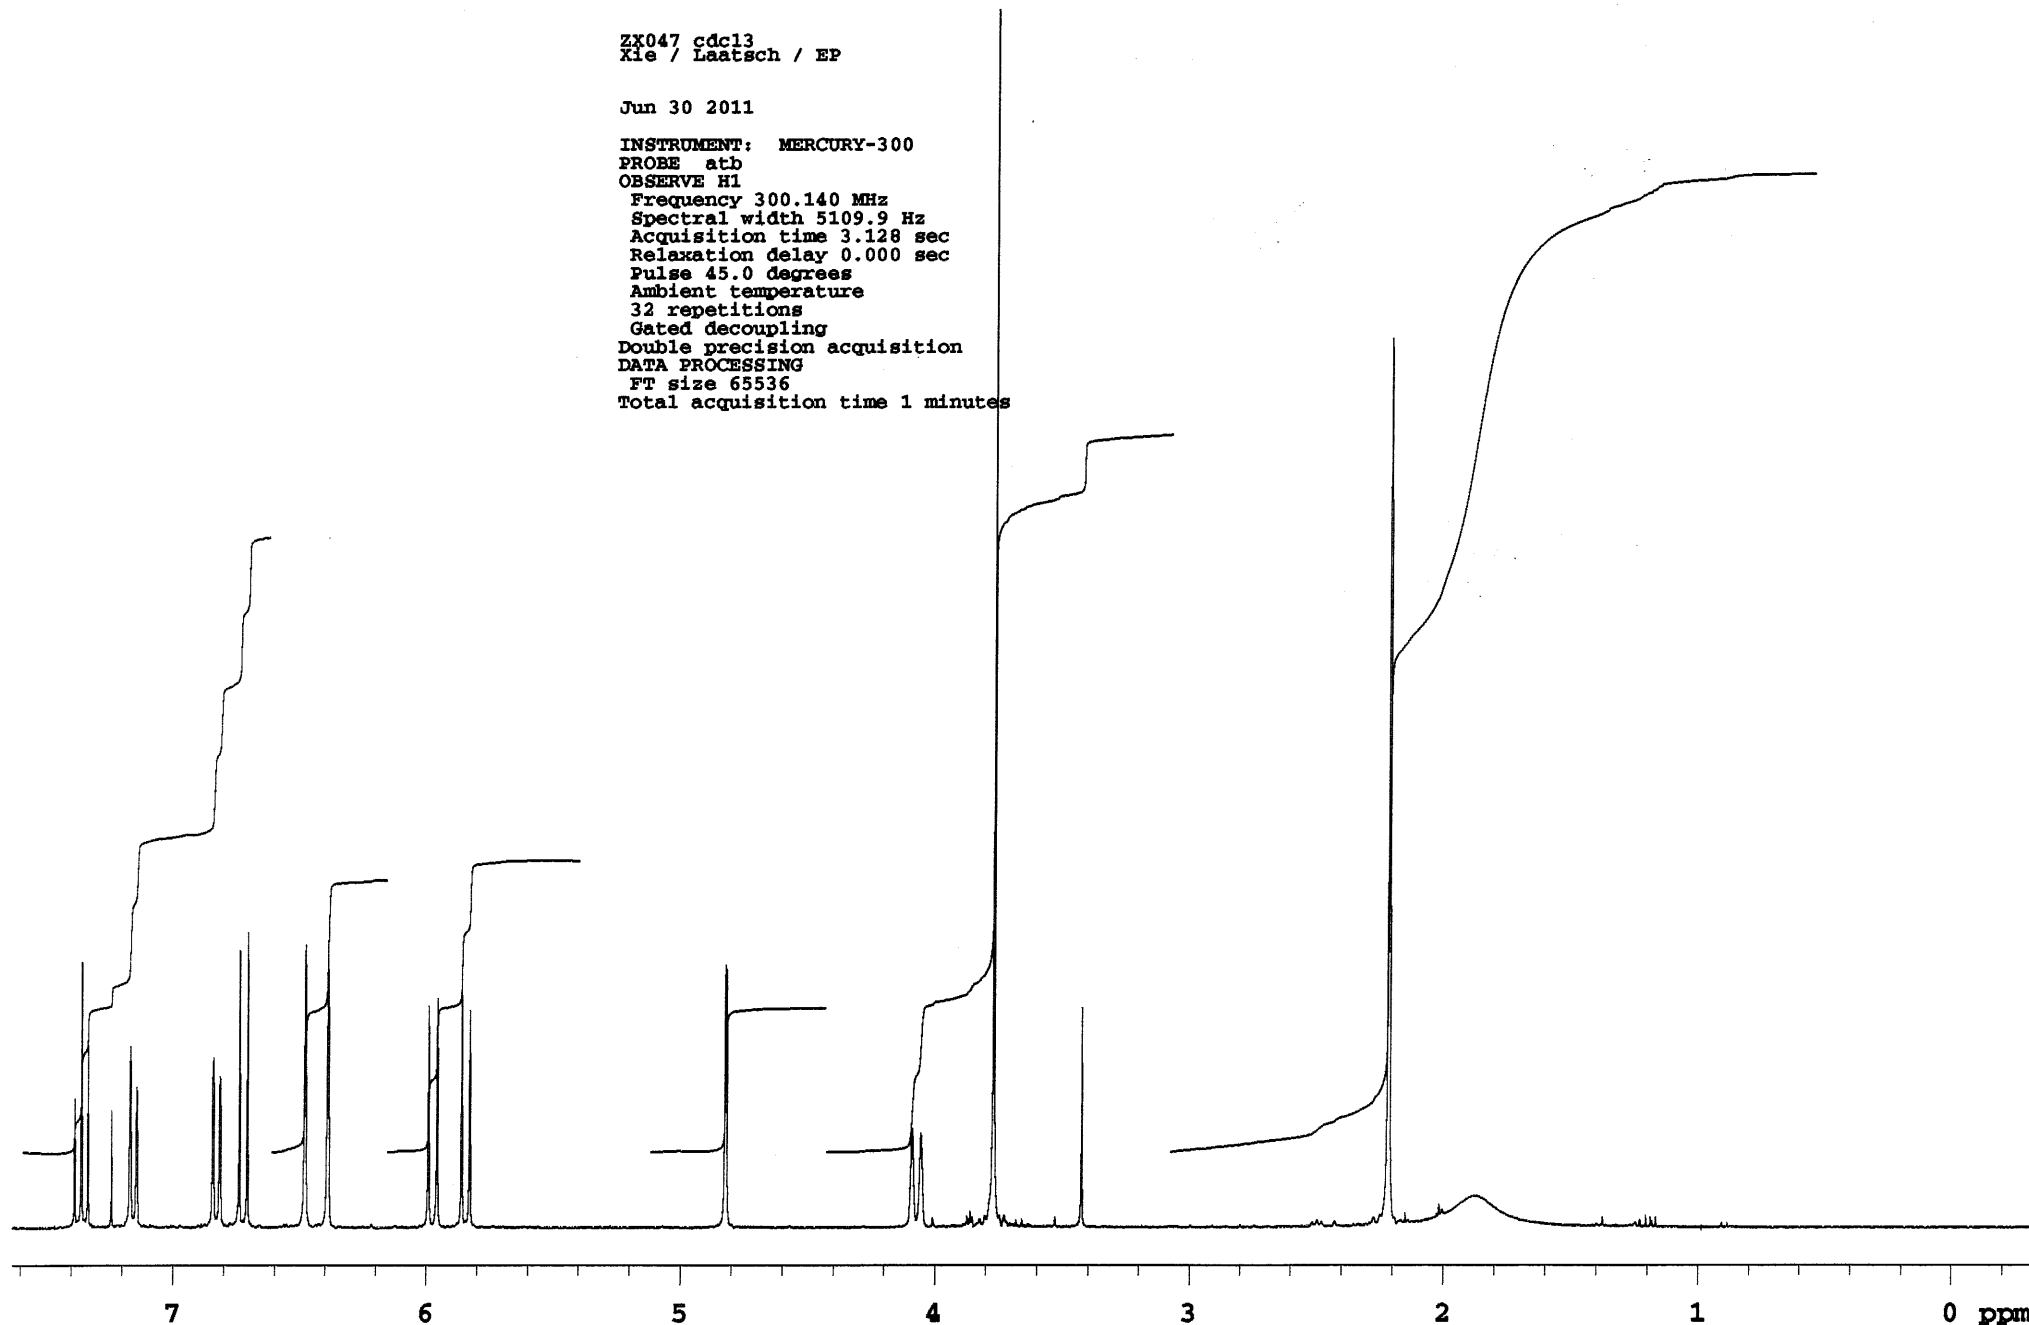

ZX047 cdc13

Xie / Laatsch / EP

DATE: Jun 30 2011

FILE:nmrdata: laatsch/zx047\_3h

# Display Report

## Analysis Info

Analysis Name Z:\Data\2011\1107Jul\sam070711\neg\ZX047 low\_18\_01\_35725.d  
Method fiamsauto\_neg\_lowlow.m  
Sample Name ZX047 low  
Comment

Acquisition Date 06.07.2011 20:27:02  
Operator BDAL@DE  
Instrument / Ser# micrOTOF 10237

## Acquisition Parameter

|             |            |                      |          |                  |           |
|-------------|------------|----------------------|----------|------------------|-----------|
| Source Type | ESI        | Ion Polarity         | Negative | Set Nebulizer    | 1.6 Bar   |
| Focus       | Not active |                      |          | Set Dry Heater   | 180 °C    |
| Scan Begin  | 50 m/z     | Set Capillary        | 3800 V   | Set Dry Gas      | 8.0 l/min |
| Scan End    | 1600 m/z   | Set End Plate Offset | -500 V   | Set Divert Valve | Source    |

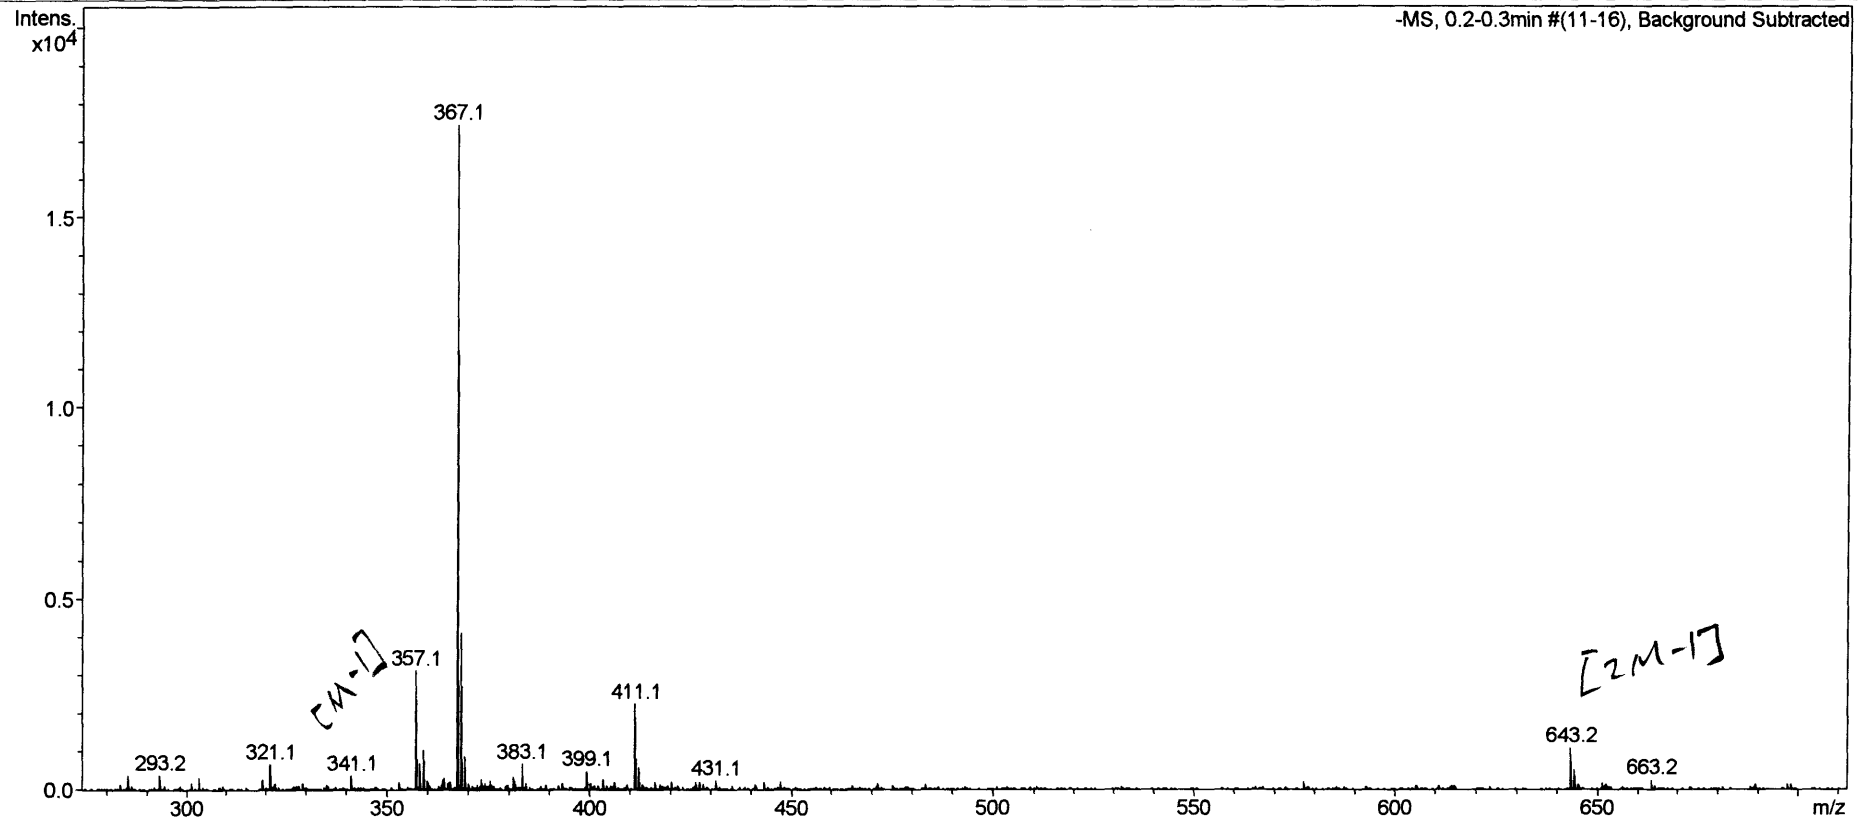

ZX047 cdcl3  
Xie/Laatsch

Jul 10 2011

INSTRUMENT VNMRs-300  
Pulse sequence gCOSY  
OBSERVE H1  
Frequency 300.535 MHz  
Spectral width 2323.4 Hz  
2D Spectral width 2323.4 Hz  
Acquisition time 0.220 sec  
Relaxation delay 1.000 sec  
Ambient temperature  
No. repetitions 1  
No. increments 128  
Double precision acquisition  
DATA PROCESSING  
Sine bell squared 0.110 sec  
FT size 1024  
F1 DATA PROCESSING  
Sine bell square 0.055 sec  
FT size 1024  
Total acquisition time 3 minutes

VS= 2567

TH= 2

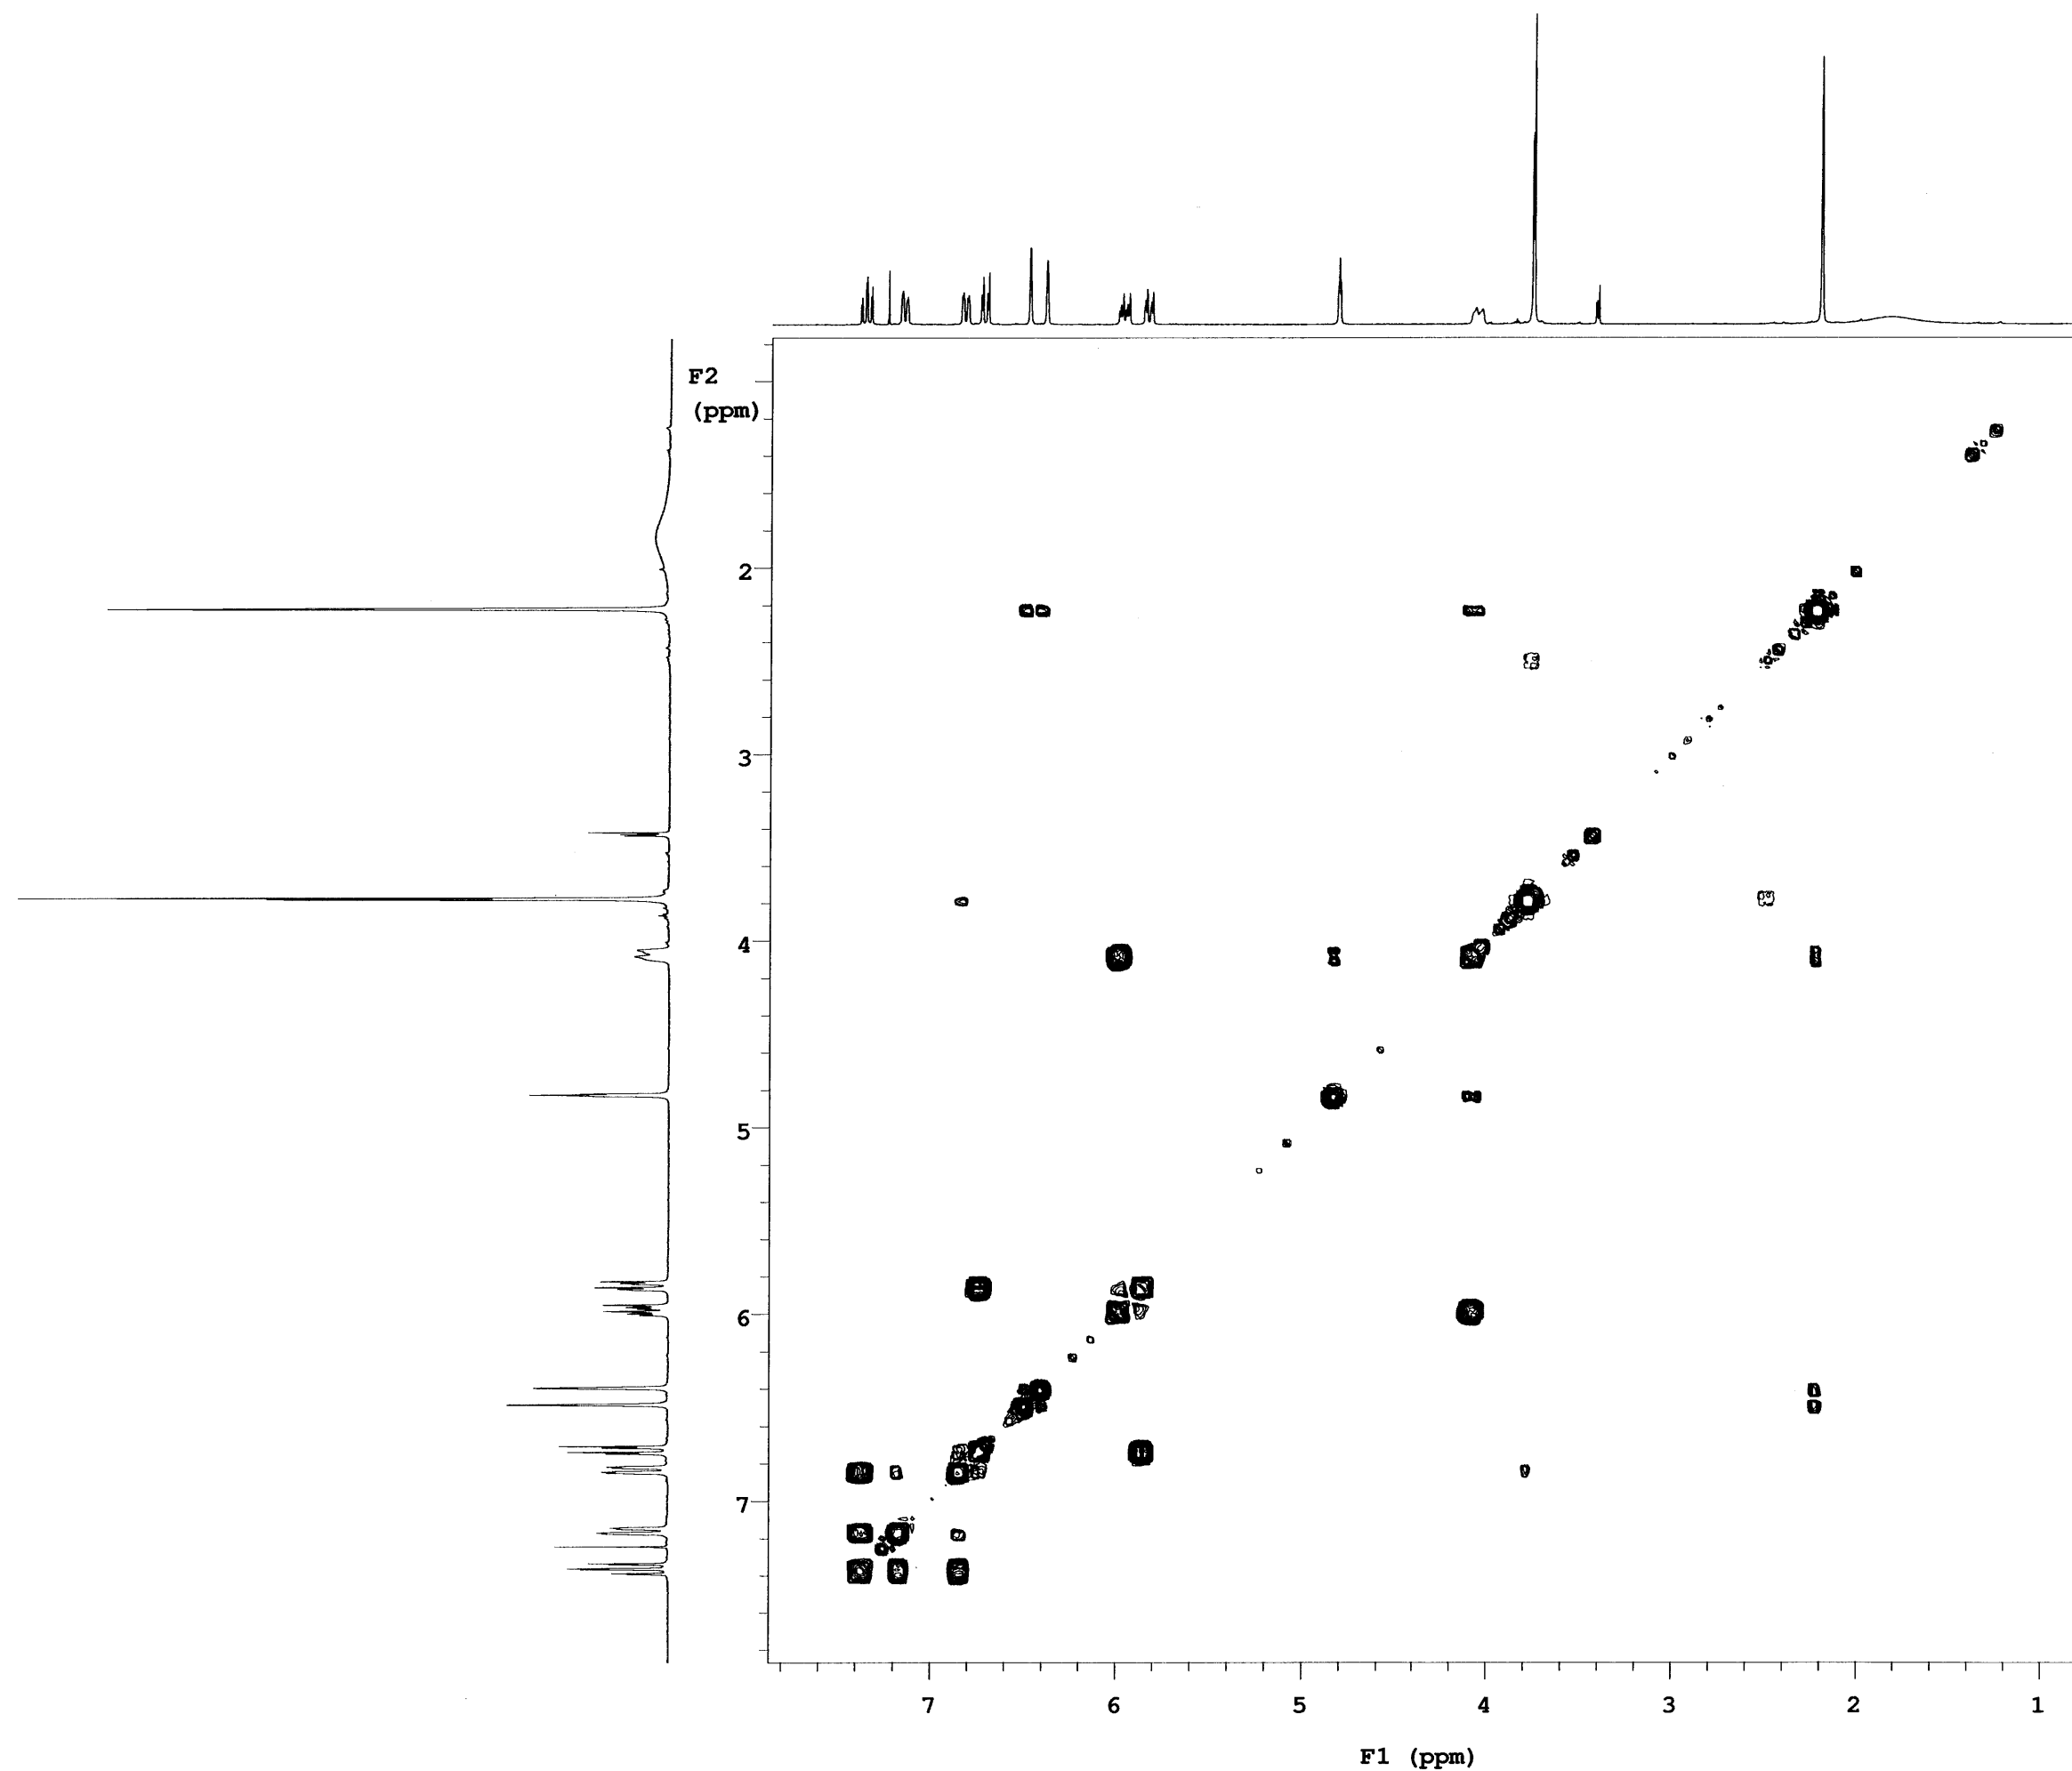

FILE=nmrdata: laatsch/zx047\_3gcosy

ZX047 cdc13  
Xie/Laatsch

Jul 10 2011

INSTRUMENT VNMRS-300  
Pulse sequence gHSQCAD  
OBSERVE H1

Frequency 300.535 MHz  
Spectral width 2323.4 Hz  
2D Spectral width 12847.3 Hz  
Acquisition time 0.230 sec  
Relaxation delay 1.000 sec  
Mixing time 0.500 sec  
Ambient temperature  
No. repetitions 8  
No. increments 256 X2

DECOUPLE C13  
Frequency 75.575 Mhz  
Power 34 dB  
Decoupler gated on during acquisition  
Decoupler gated off during delay  
W40\_ATB\_W005 modulated

Double precision acquisition  
DATA PROCESSING

Gaussian apodization 0.106 sec  
FT size 2048

F1 DATA PROCESSING  
Gaussian apodization 0.018 sec  
FT size 2048

Total acquisition time 1:59 hours

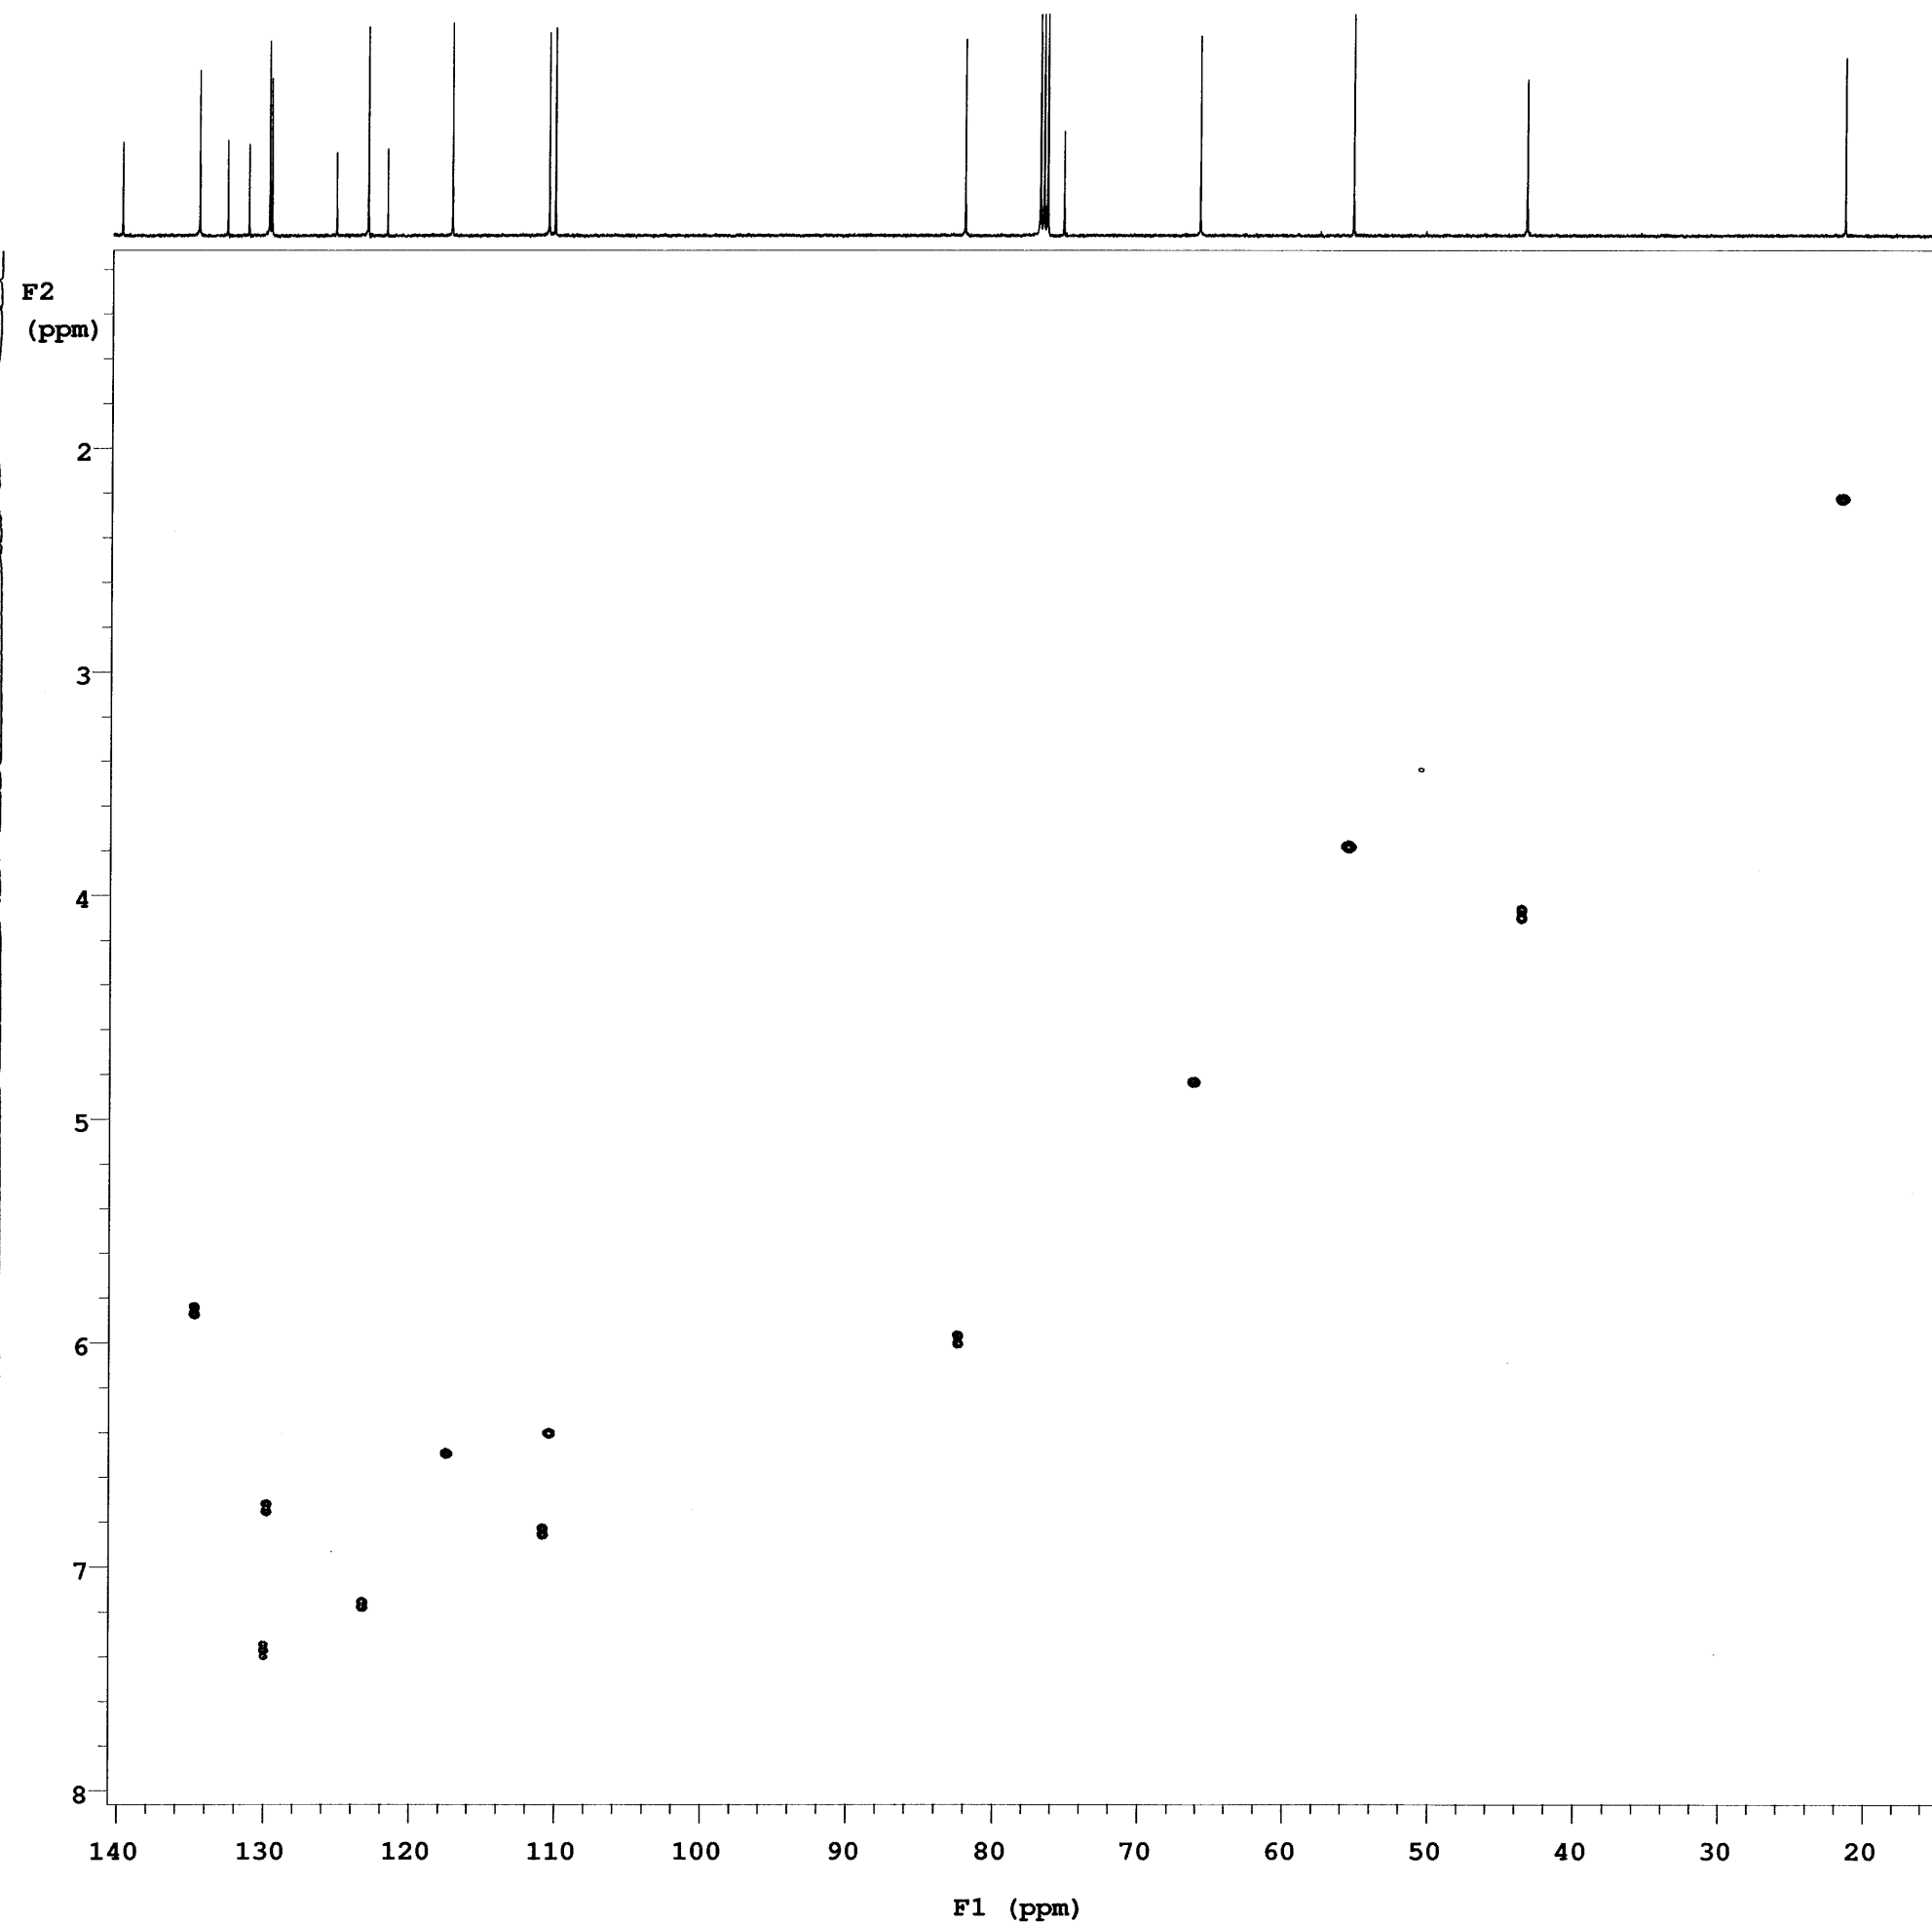

VS= 12147

TH= 5

FILE=

ZX047 cdc13  
Xie/Laatsch

Jul 10 2011

INSTRUMENT VNMRs-300  
Pulse sequence gHSQCAD  
OBSERVE H1

Frequency 300.535 MHz  
Spectral width 2323.4 Hz  
2D Spectral width 12847.3 Hz  
Acquisition time 0.230 sec  
Relaxation delay 1.000 sec  
Mixing time 0.500 sec  
Ambient temperature  
No. repetitions 8  
No. increments 256 X2

DECOUPLE C13  
Frequency 75.575 Mhz  
Power 34 dB  
Decoupler gated on during acquisition  
Decoupler gated off during delay  
W40\_ATB\_W005 modulated  
Double precision acquisition  
DATA PROCESSING  
Gaussian apodization 0.106 sec  
FT size 2048  
F1 DATA PROCESSING  
Gaussian apodization 0.018 sec  
FT size 2048  
Total acquisition time 1:59 hours

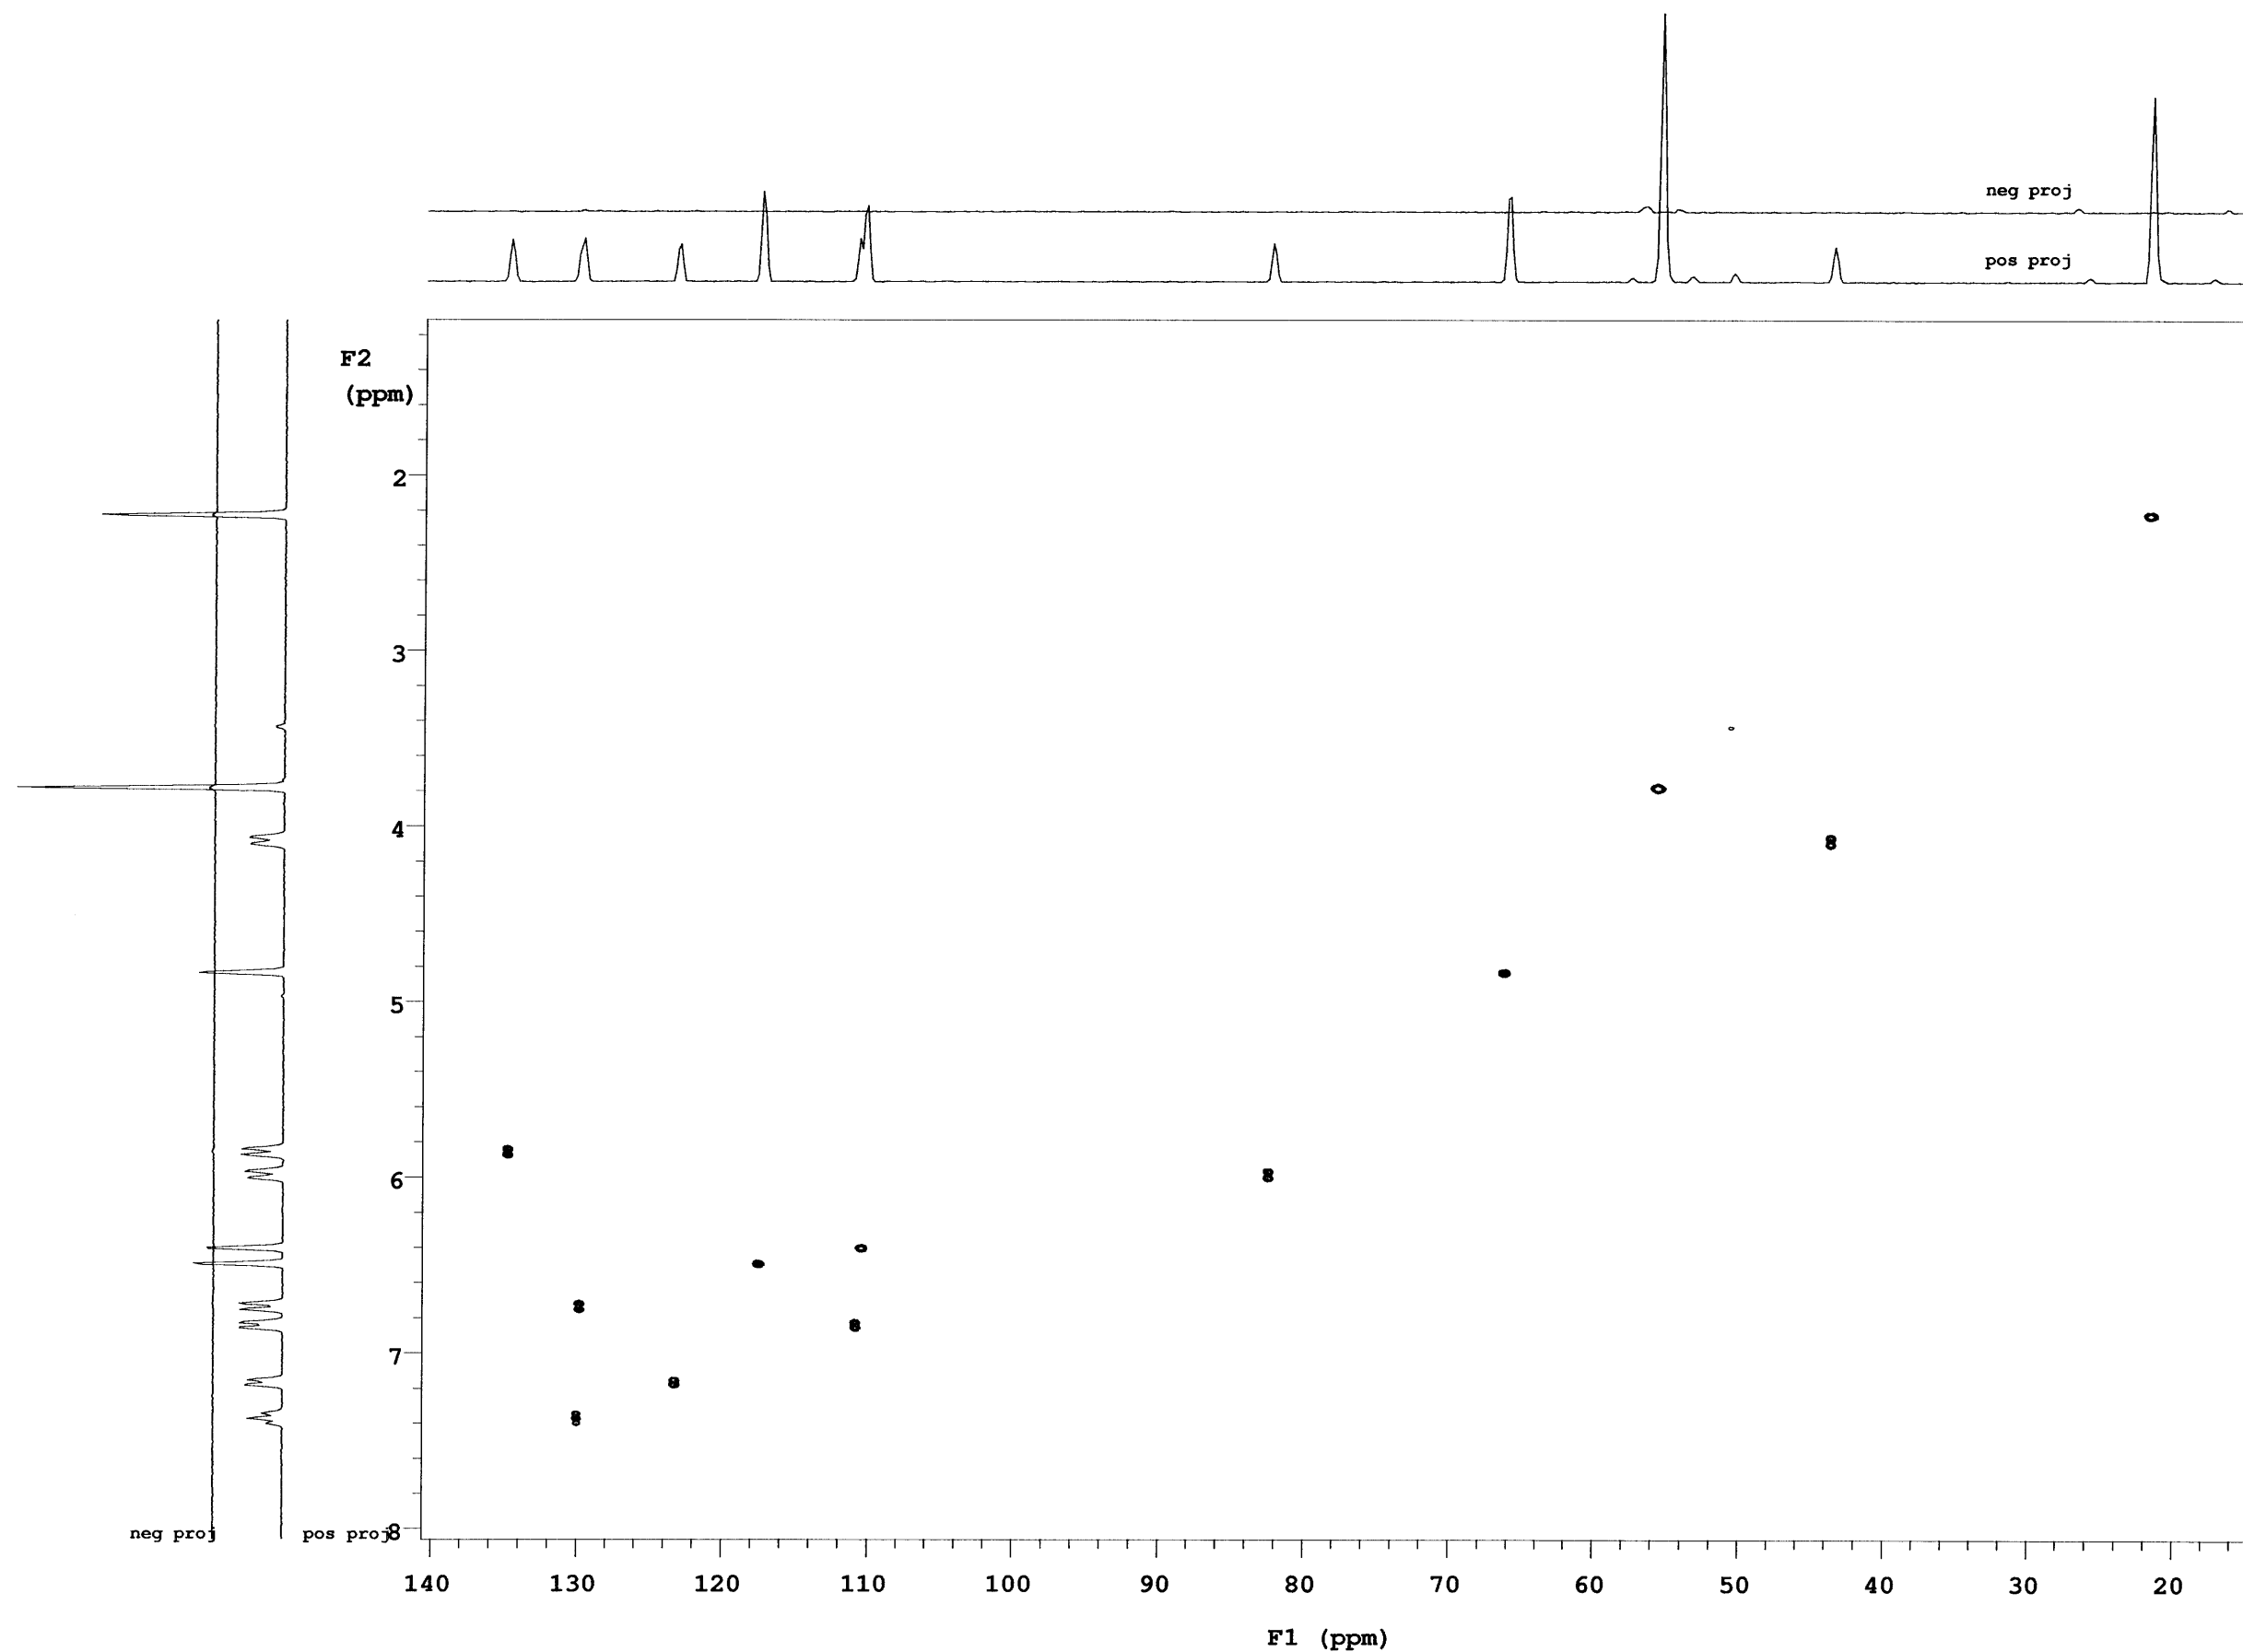

FILE=



ZX047 cdc13  
Xie/Laatsch

Jul 10 2011

INSTRUMENT VNMRS-300

Pulse sequence gHMBC

OBSERVE H1

Frequency 300.535 MHz

Spectral width 2323.4 Hz

2D Spectral width 12091.9 Hz

Acquisition time 0.128 sec

Relaxation delay 1.000 sec

Mixing time 0.080 sec

Ambient temperature

No. repetitions 64

No. increments 256

Double precision acquisition

DATA PROCESSING

Sine bell 0.064 sec

FT size 1024

F1 DATA PROCESSING

Sine bell 0.021 sec

FT size 2048

Total acquisition time 5:33 hours

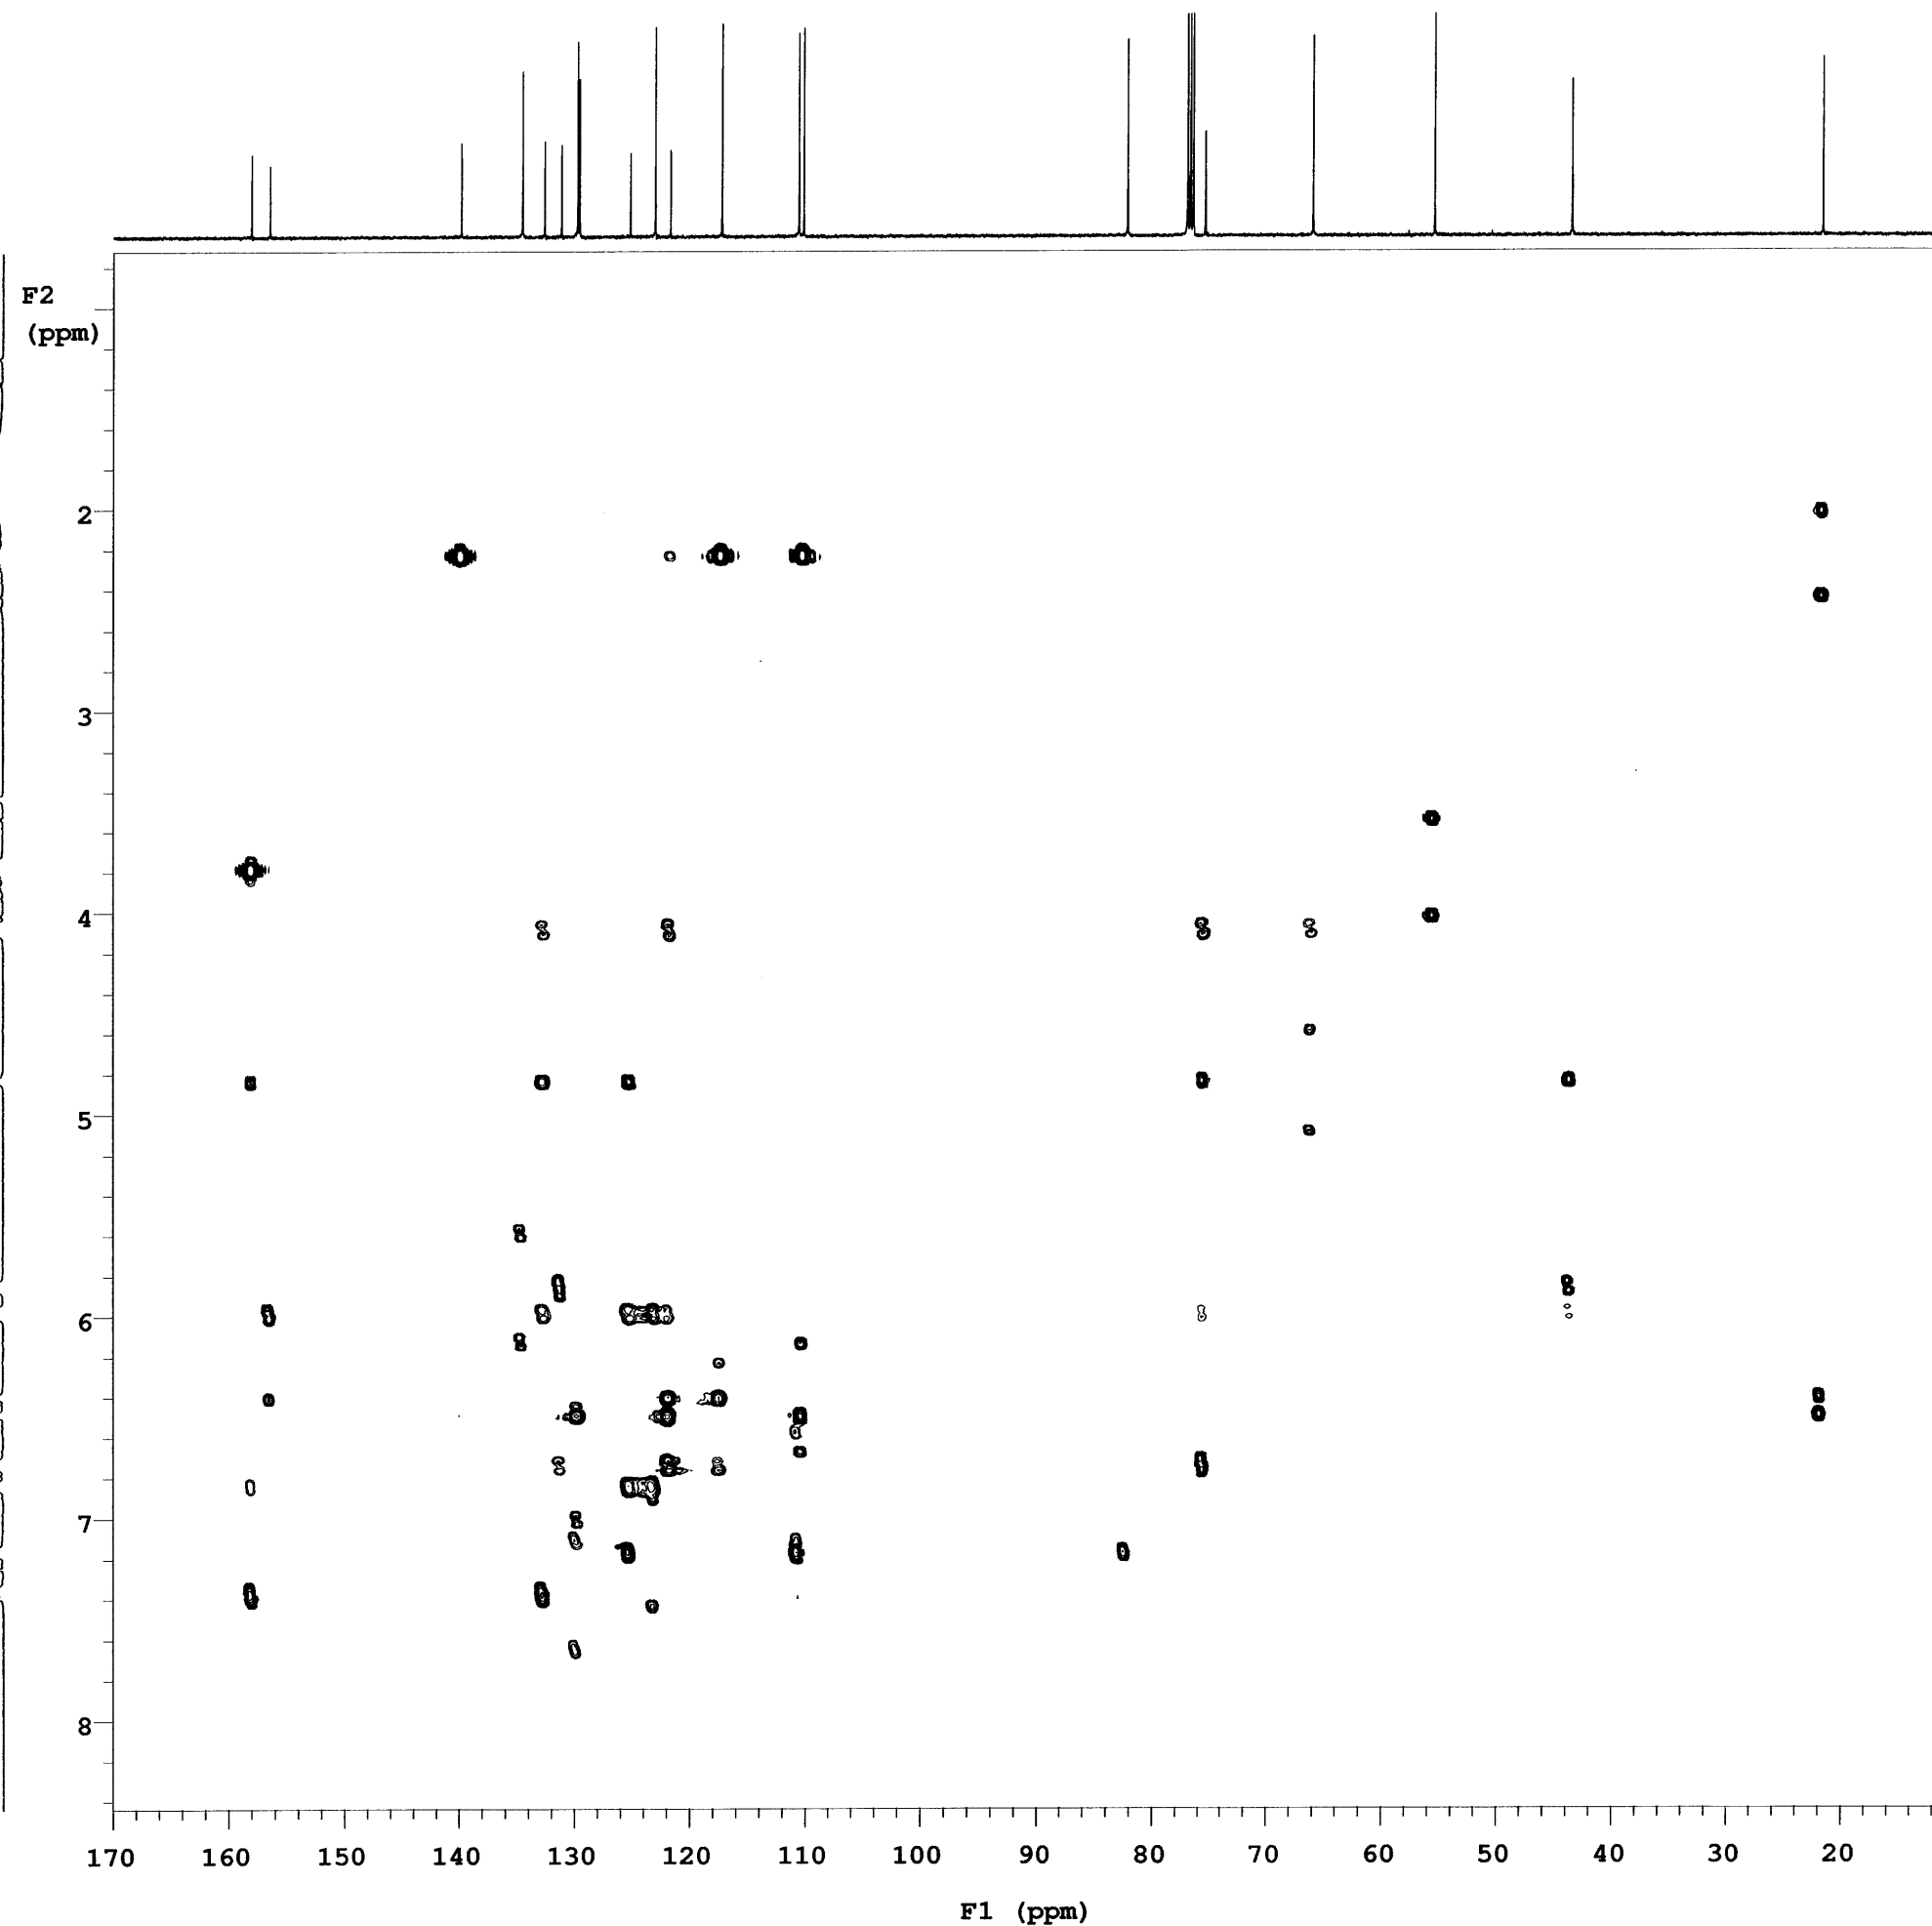

VS= 9201

TH= 2

ZX047 cdcl3  
Xie/Laatsch

Jul 10 2011

INSTRUMENT VNMRS-300

Pulse sequence ghMBC

OBSERVE H1

Frequency 300.535 MHz

Spectral width 2323.4 Hz

2D Spectral width 12091.9 Hz

Acquisition time 0.128 sec

Relaxation delay 1.000 sec

Mixing time 0.080 sec

Ambient temperature

No. repetitions 64

No. increments 256

Double precision acquisition

DATA PROCESSING

Sine bell 0.064 sec

FT size 1024

F1 DATA PROCESSING

Sine bell 0.021 sec

FT size 2048

Total acquisition time 5:33 hours

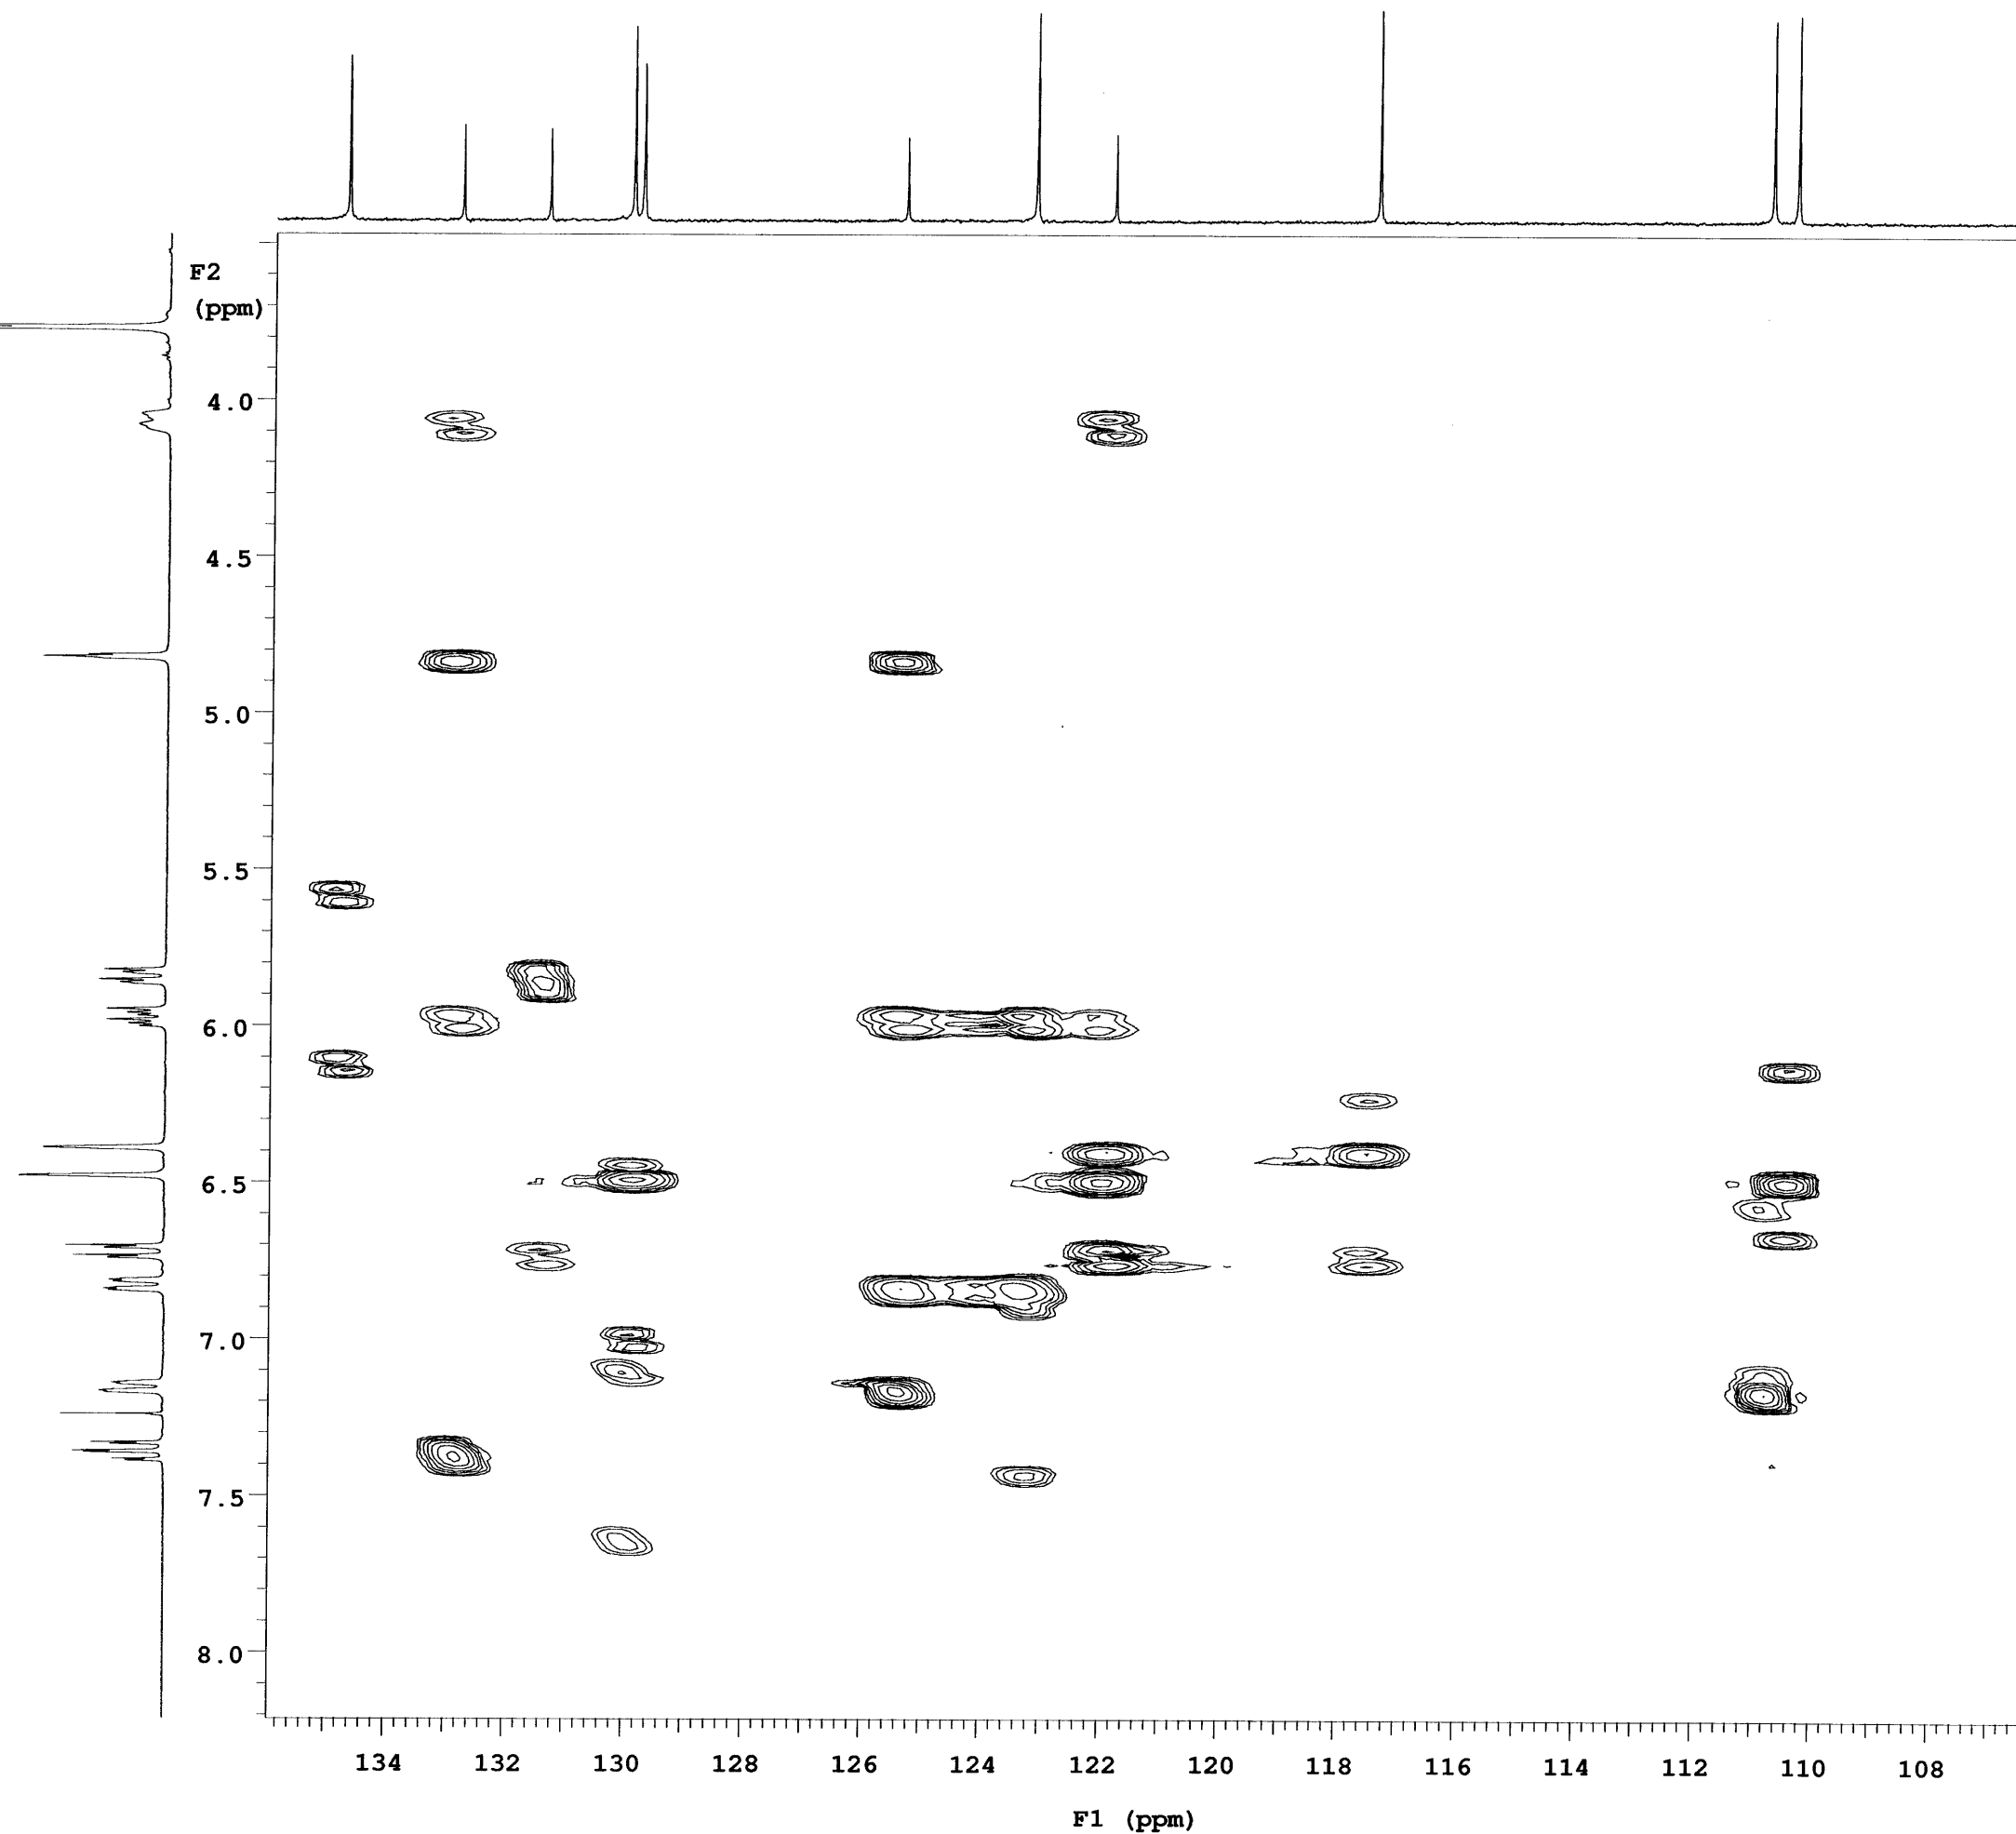

VS= 9201

TH= 2

ZX047 cdcl3  
Xie/Laatsch

Jul 10 2011

INSTRUMENT VNMRS-300

Pulse sequence gHMBC

OBSERVE H1

Frequency 300.535 MHz

Spectral width 2323.4 Hz

2D Spectral width 12091.9 Hz

Acquisition time 0.128 sec

Relaxation delay 1.000 sec

Mixing time 0.080 sec

Ambient temperature

No. repetitions 64

No. increments 256

Double precision acquisition

DATA PROCESSING

Sine bell 0.064 sec

FT size 1024

F1 DATA PROCESSING

Sine bell 0.021 sec

FT size 2048

Total acquisition time 5:33 hours

VS= 9201

TH= 2

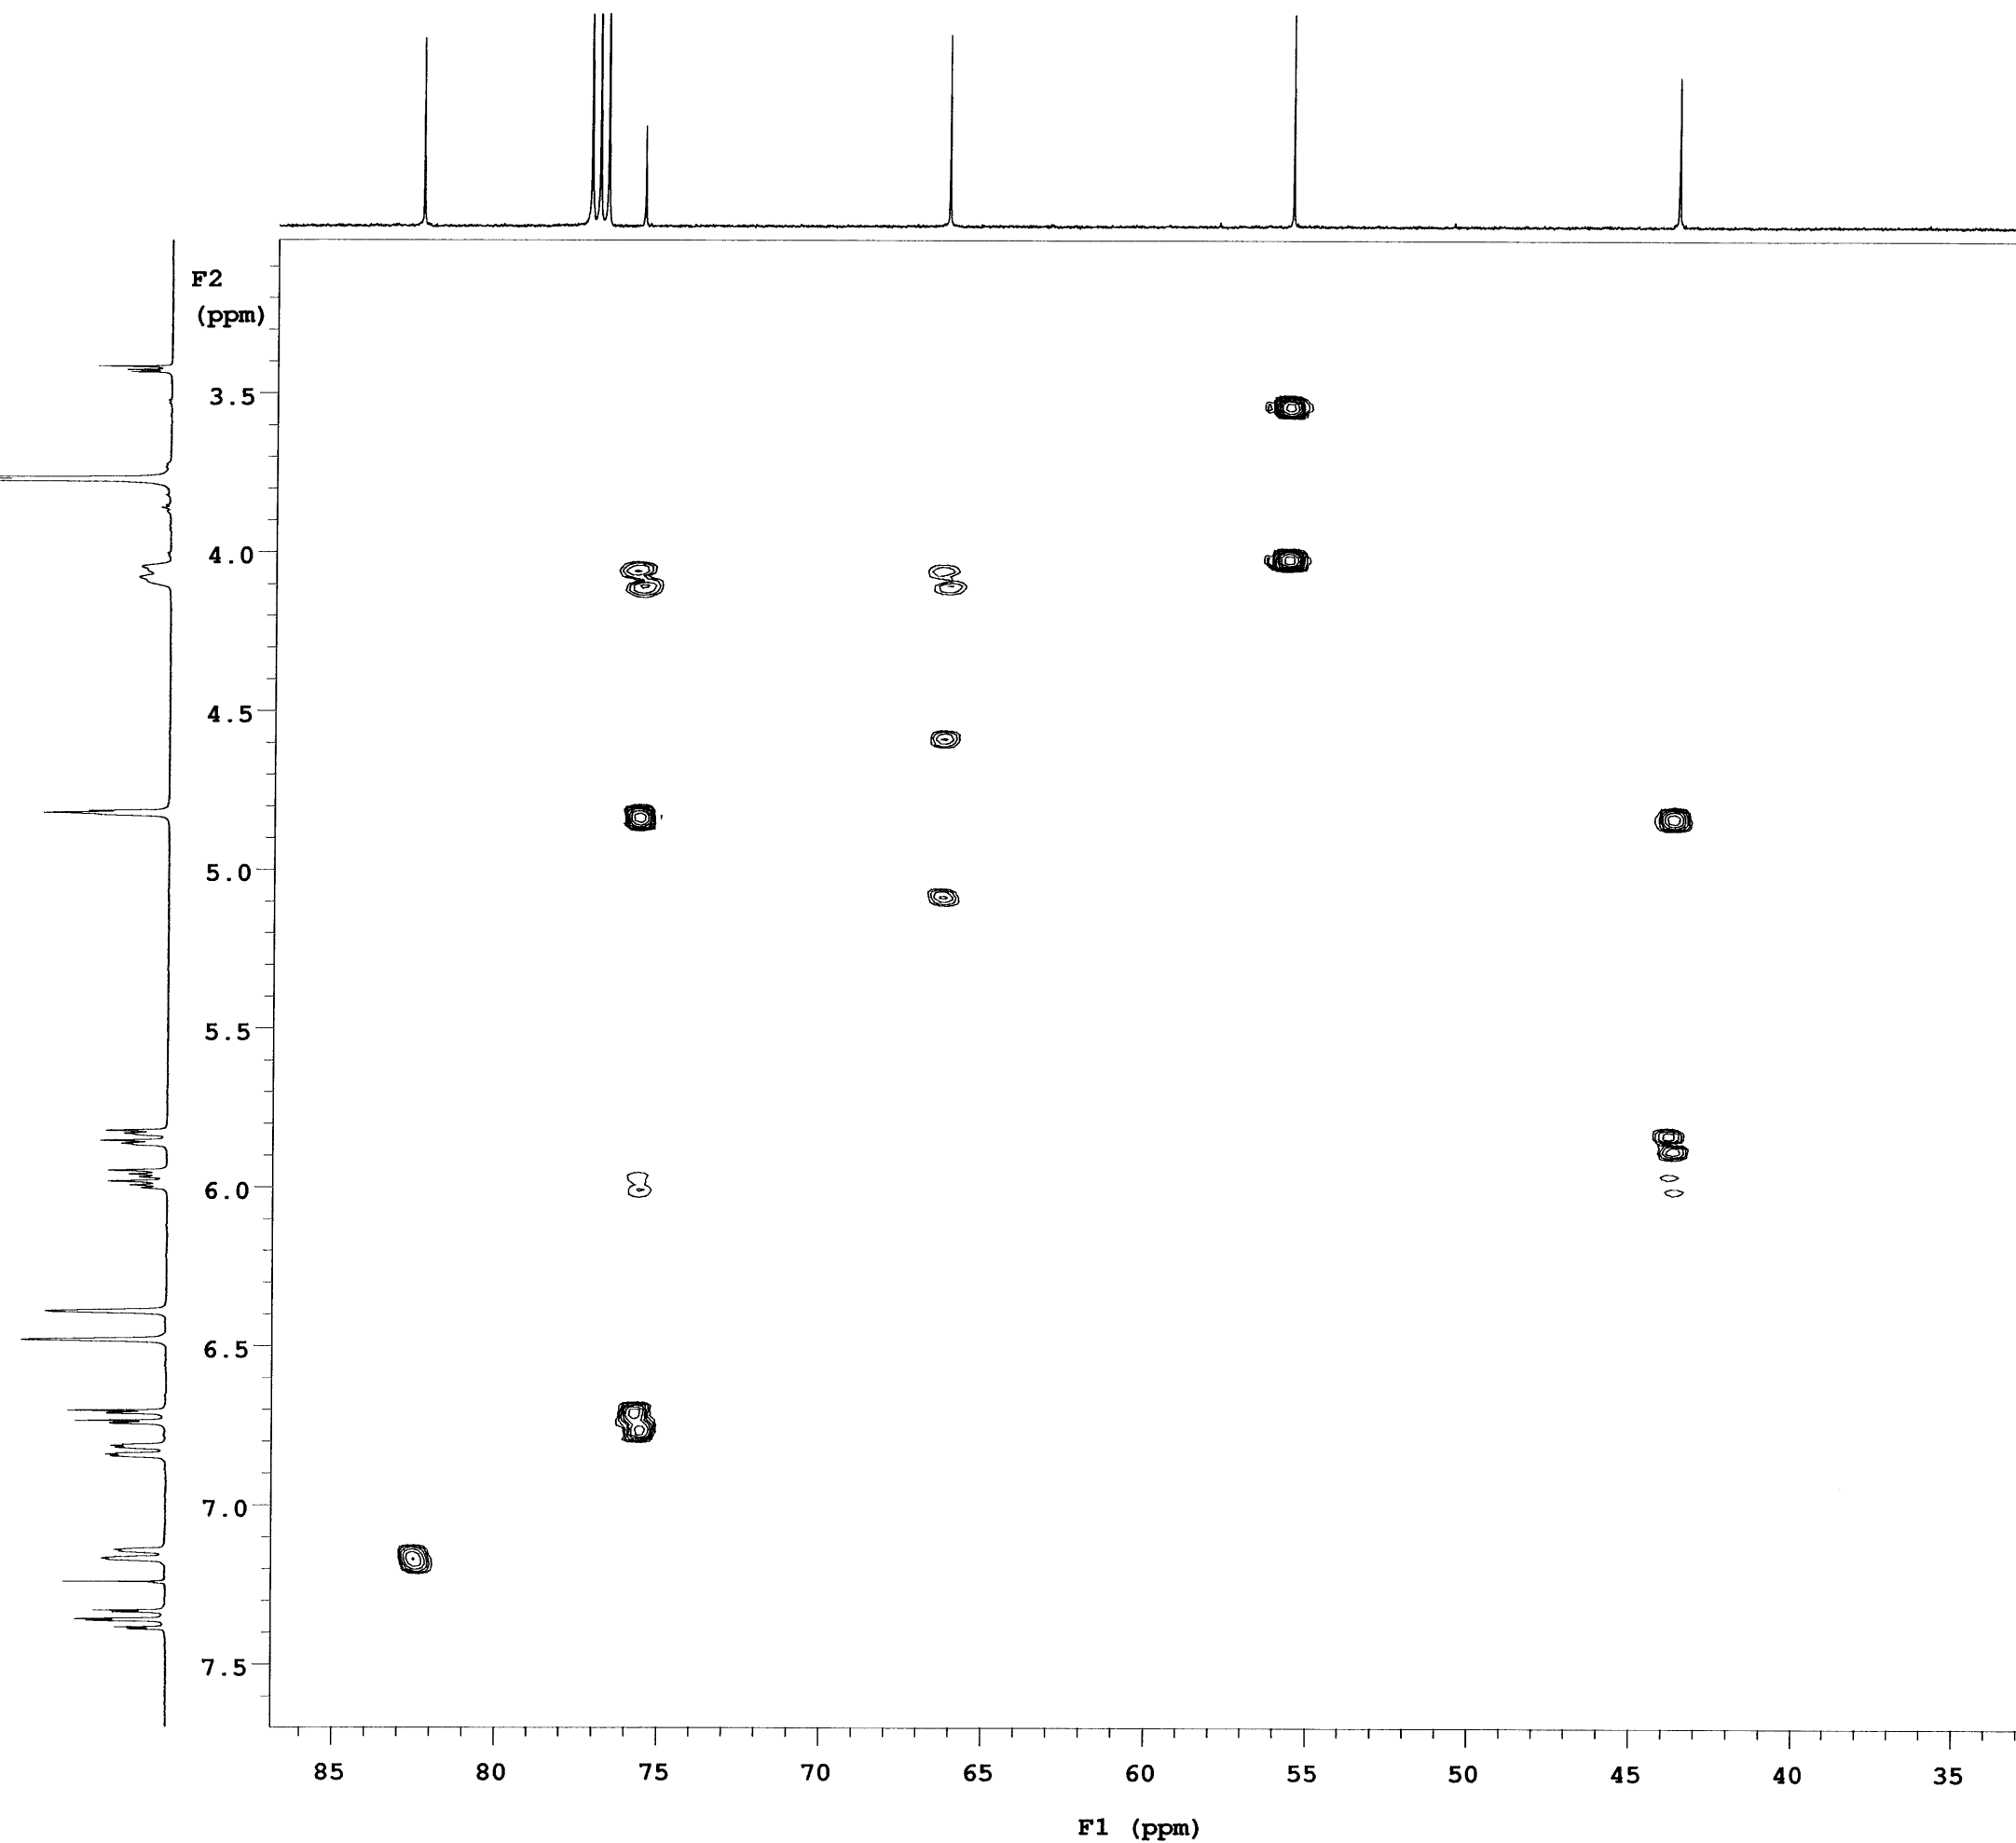

FILE=nmrdata: laatsch/zx047\_3ghmbo

zx047 cdc13  
Xie/Laatsch  
Jul 5 2011

APT - Spectrum : CH,CH3 up / C,CH2 down

INSTRUMENT INOVA-500  
PROBE coldc 3mm  
Pulse sequence APT\_ad  
OBSERVE C13  
Frequency 125.707 MHz  
Spectral width 30165.9 Hz  
Acquisition time 2.122 sec  
Relaxation delay 2.000 sec  
Pulse width 90.0 degrees  
Temperature 27.0 deg. C / 300.1 K  
No. repetitions 160  
DECOUPLE H1  
Frequency 499.877 Mhz  
Power 32 dB  
Decoupler gated on during acquisition  
WALTZ-16 modulated  
Double precision acquisition  
DATA PROCESSING  
Line broadening 1.0 Hz  
FT size 262144  
Total acquisition time 11 minutes

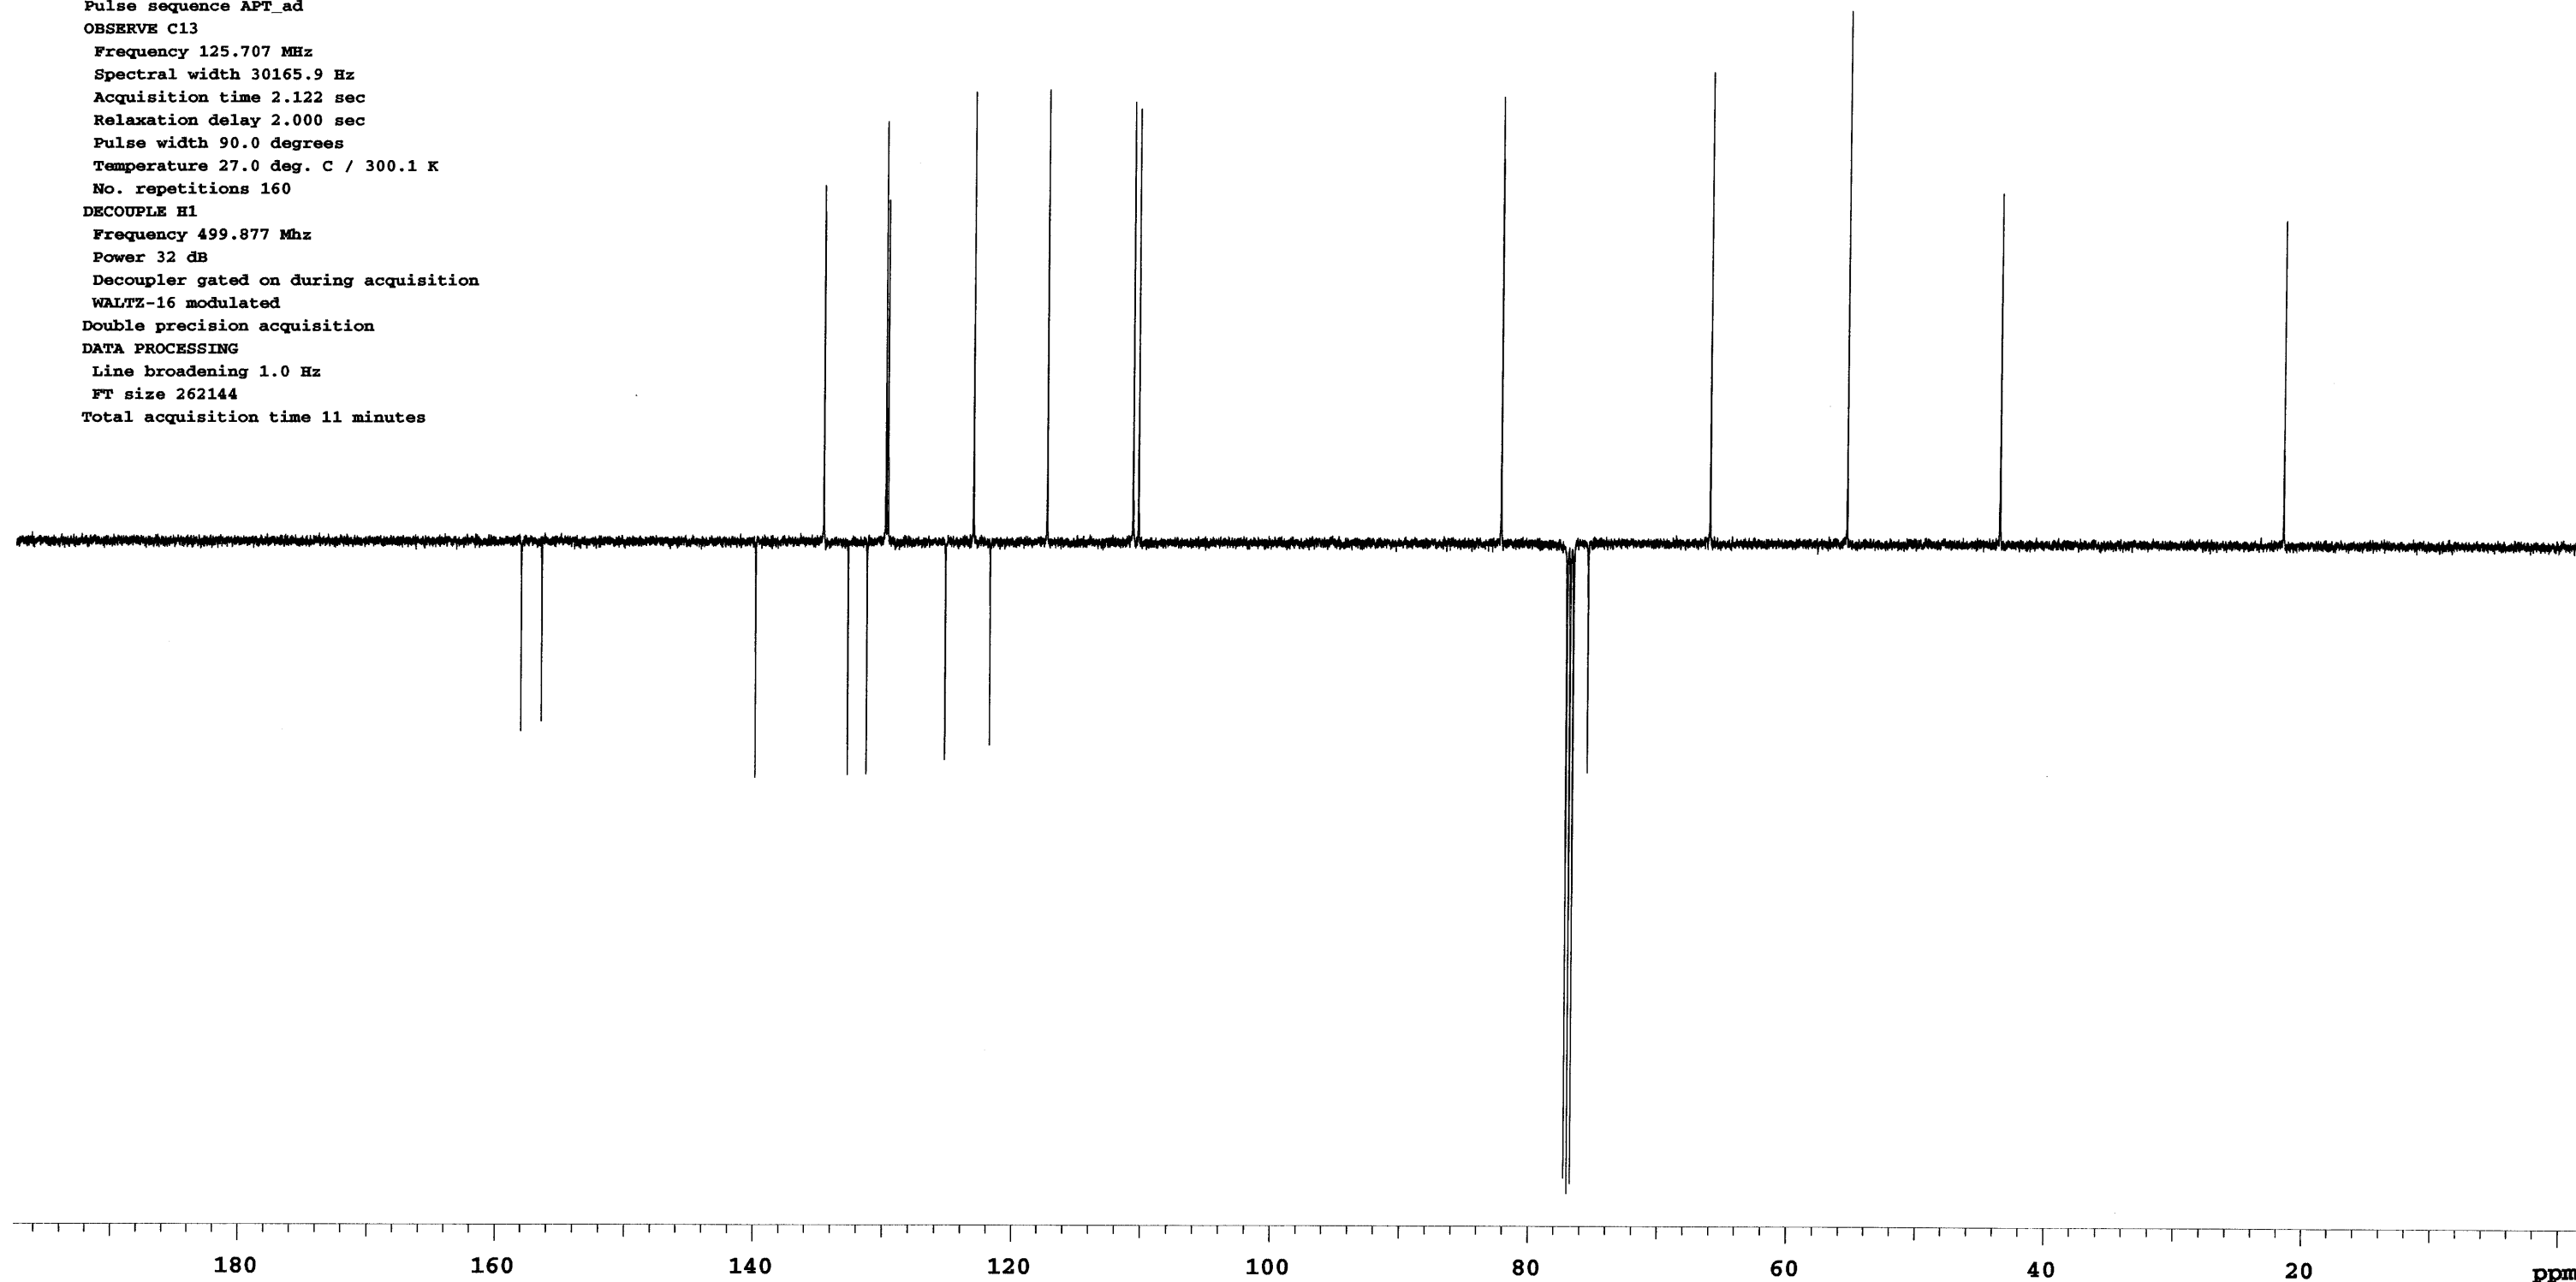

zx047 cdc13  
Xie/Laatsch

DATE: Jul 5 2011

FILE:nmrdata: laatsch/zx047\_5apt\_ad

zx047 cdcl3  
Xie/Laatsch  
Jul 5 2011

INSTRUMENT INOVA-500  
PROBE coldc 3mm  
OBSERVE C13  
Frequency 125.707 MHz  
Spectral width 30120.5 Hz  
Acquisition time 2.125 sec  
Relaxation delay 0.000 sec  
Pulse width 36.0 degrees  
Temperature 27.0 deg. C / 300.1 K  
No. repetitions 640  
DECOUPLE H1  
Frequency 499.877 Mhz  
Power 32 dB  
Decoupler continuously on  
WALTZ-16 modulated  
Double precision acquisition  
DATA PROCESSING  
Line broadening 1.0 Hz  
FT size 262144  
Total acquisition time 22 minutes

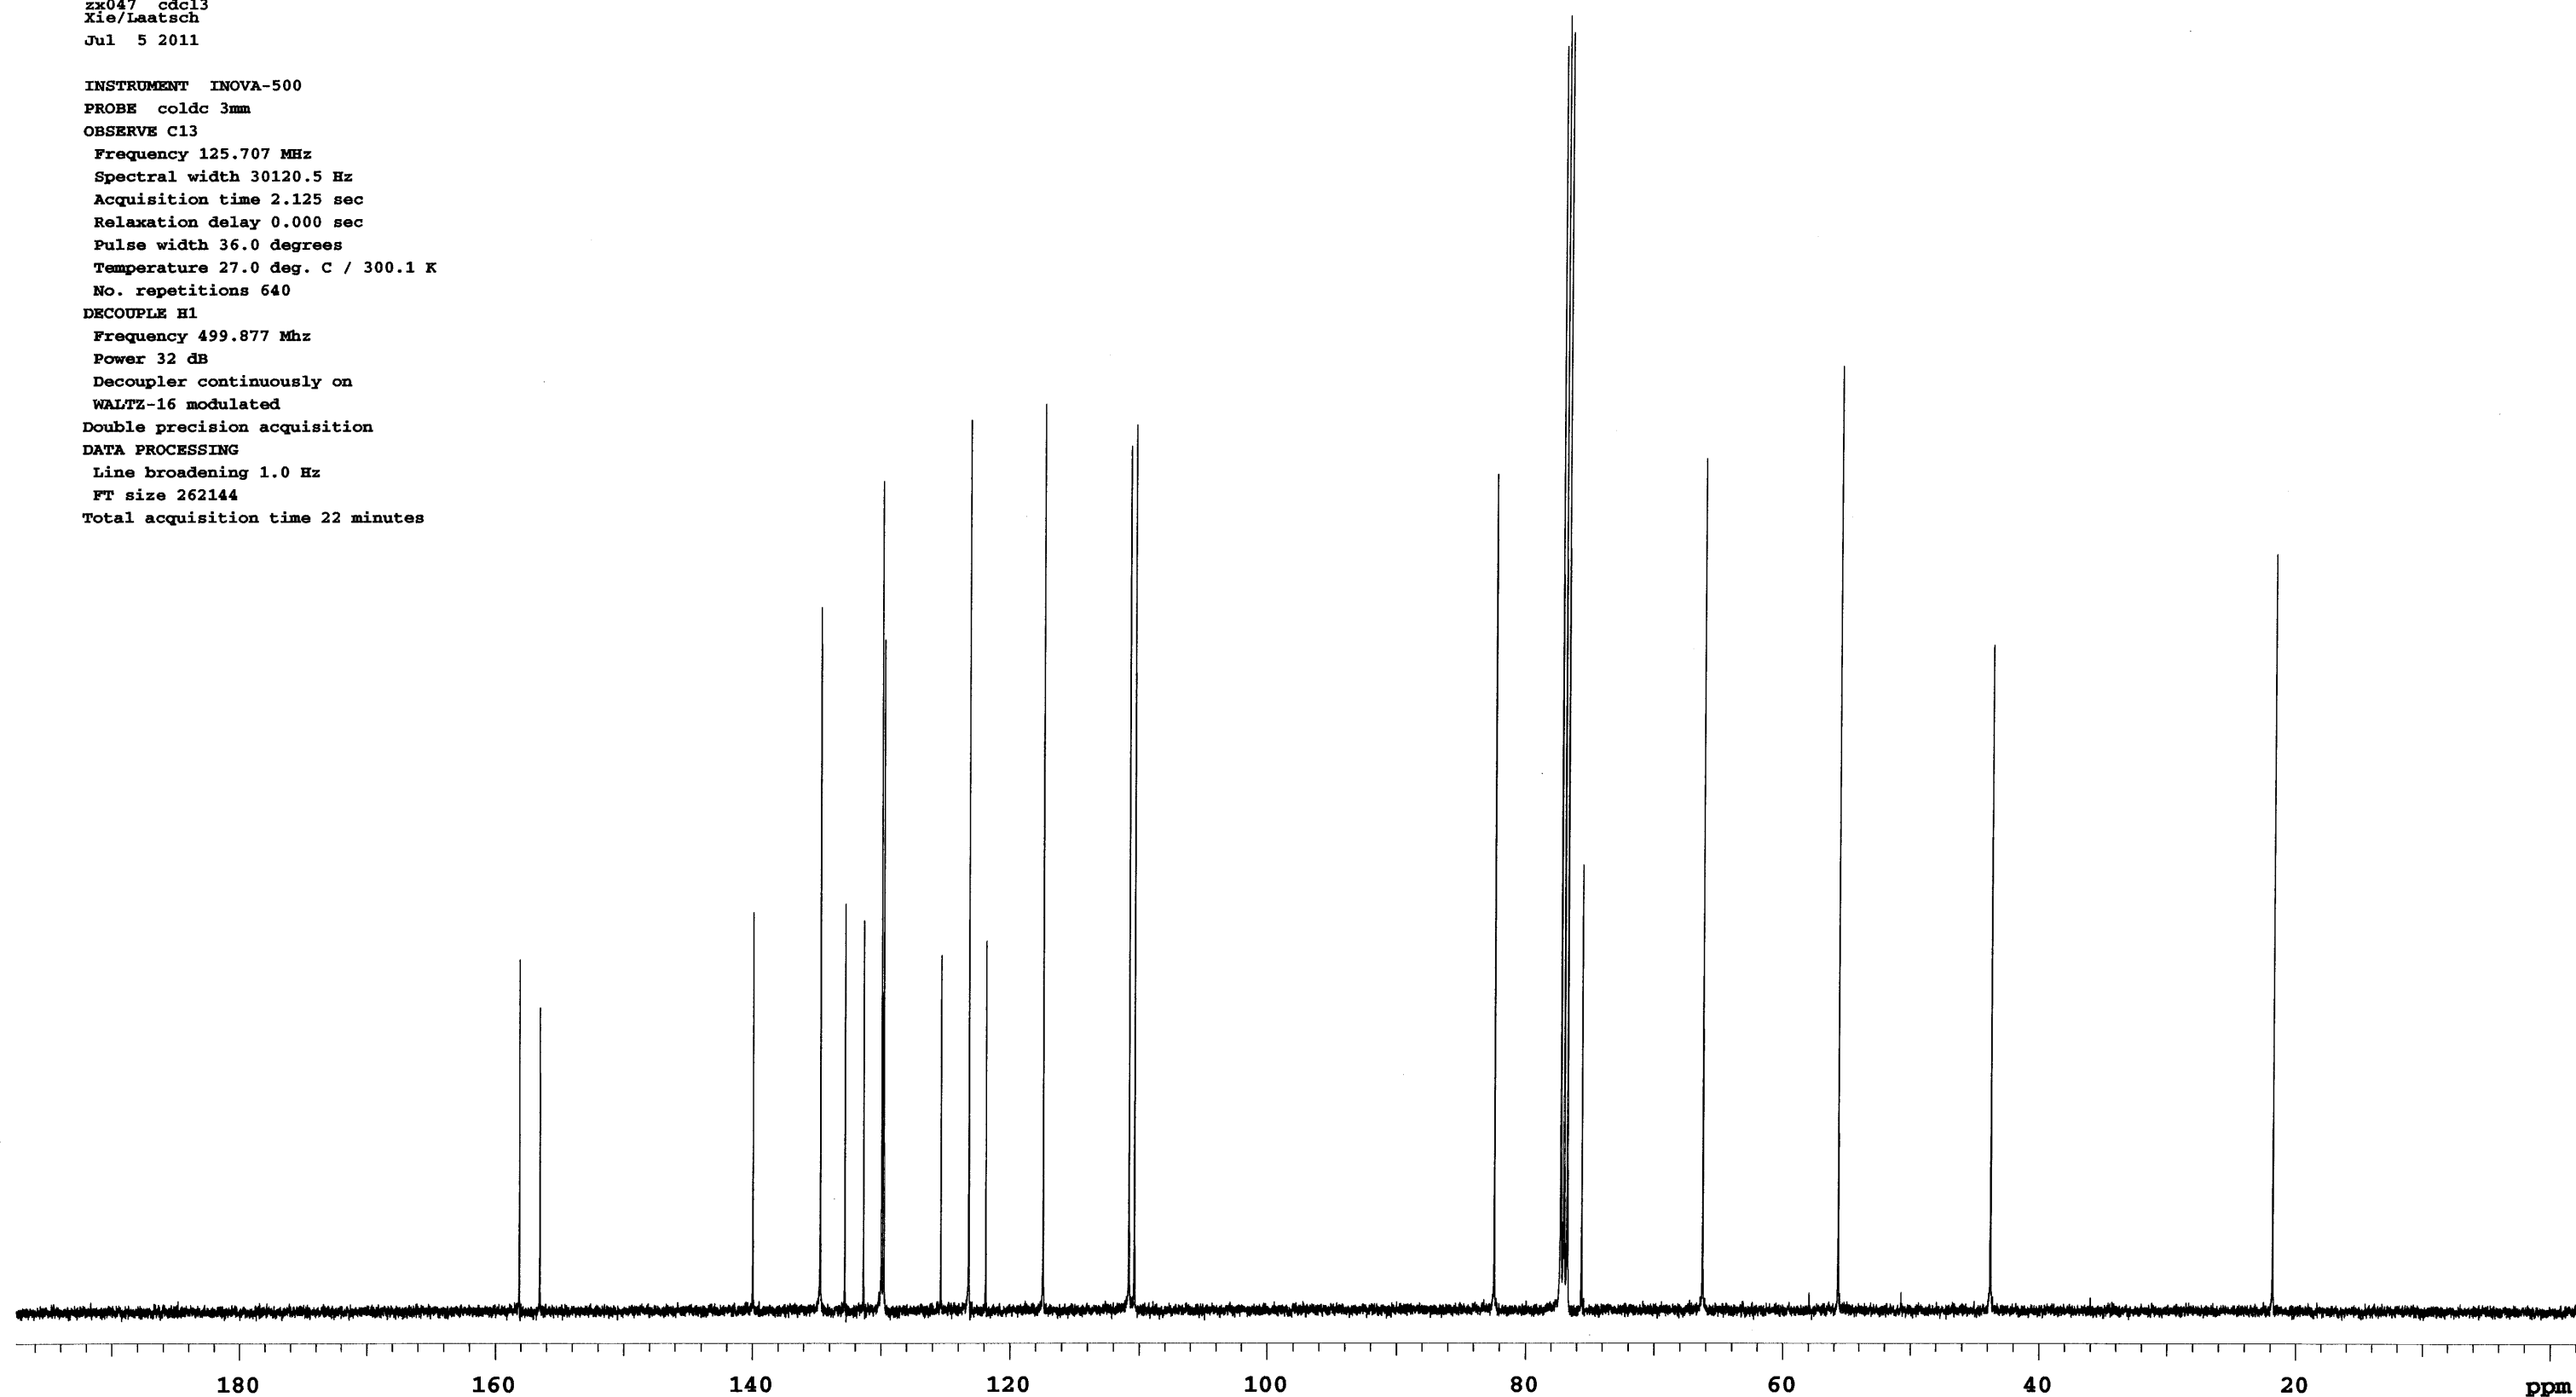

zx047 cdcl3  
Xie/Laatsch

DATE: Jul 5 2011

FILE:nmrdest: laatsch/zx047\_5c

ZX047 cdcl3  
Xie / Laatsch / mw

Sep 3 2011

INSTRUMENT INOVA-600  
Pulse sequence NOESY  
OBSERVE H1

Frequency 599.740 MHz  
Spectral width 4845.0 Hz  
2D Spectral width 4845.0 Hz  
Acquisition time 0.211 sec  
Relaxation delay 1.000 sec  
Mixing time 1.000 sec  
Ambient temperature  
No. repetitions 16  
No. increments 256 X2

Double precision acquisition  
DATA PROCESSING

Gaussian apodization 0.098 sec  
FT size 2048

F1 DATA PROCESSING

Gaussian apodization 0.049 sec  
FT size 2048

Total acquisition time 5:06 hours

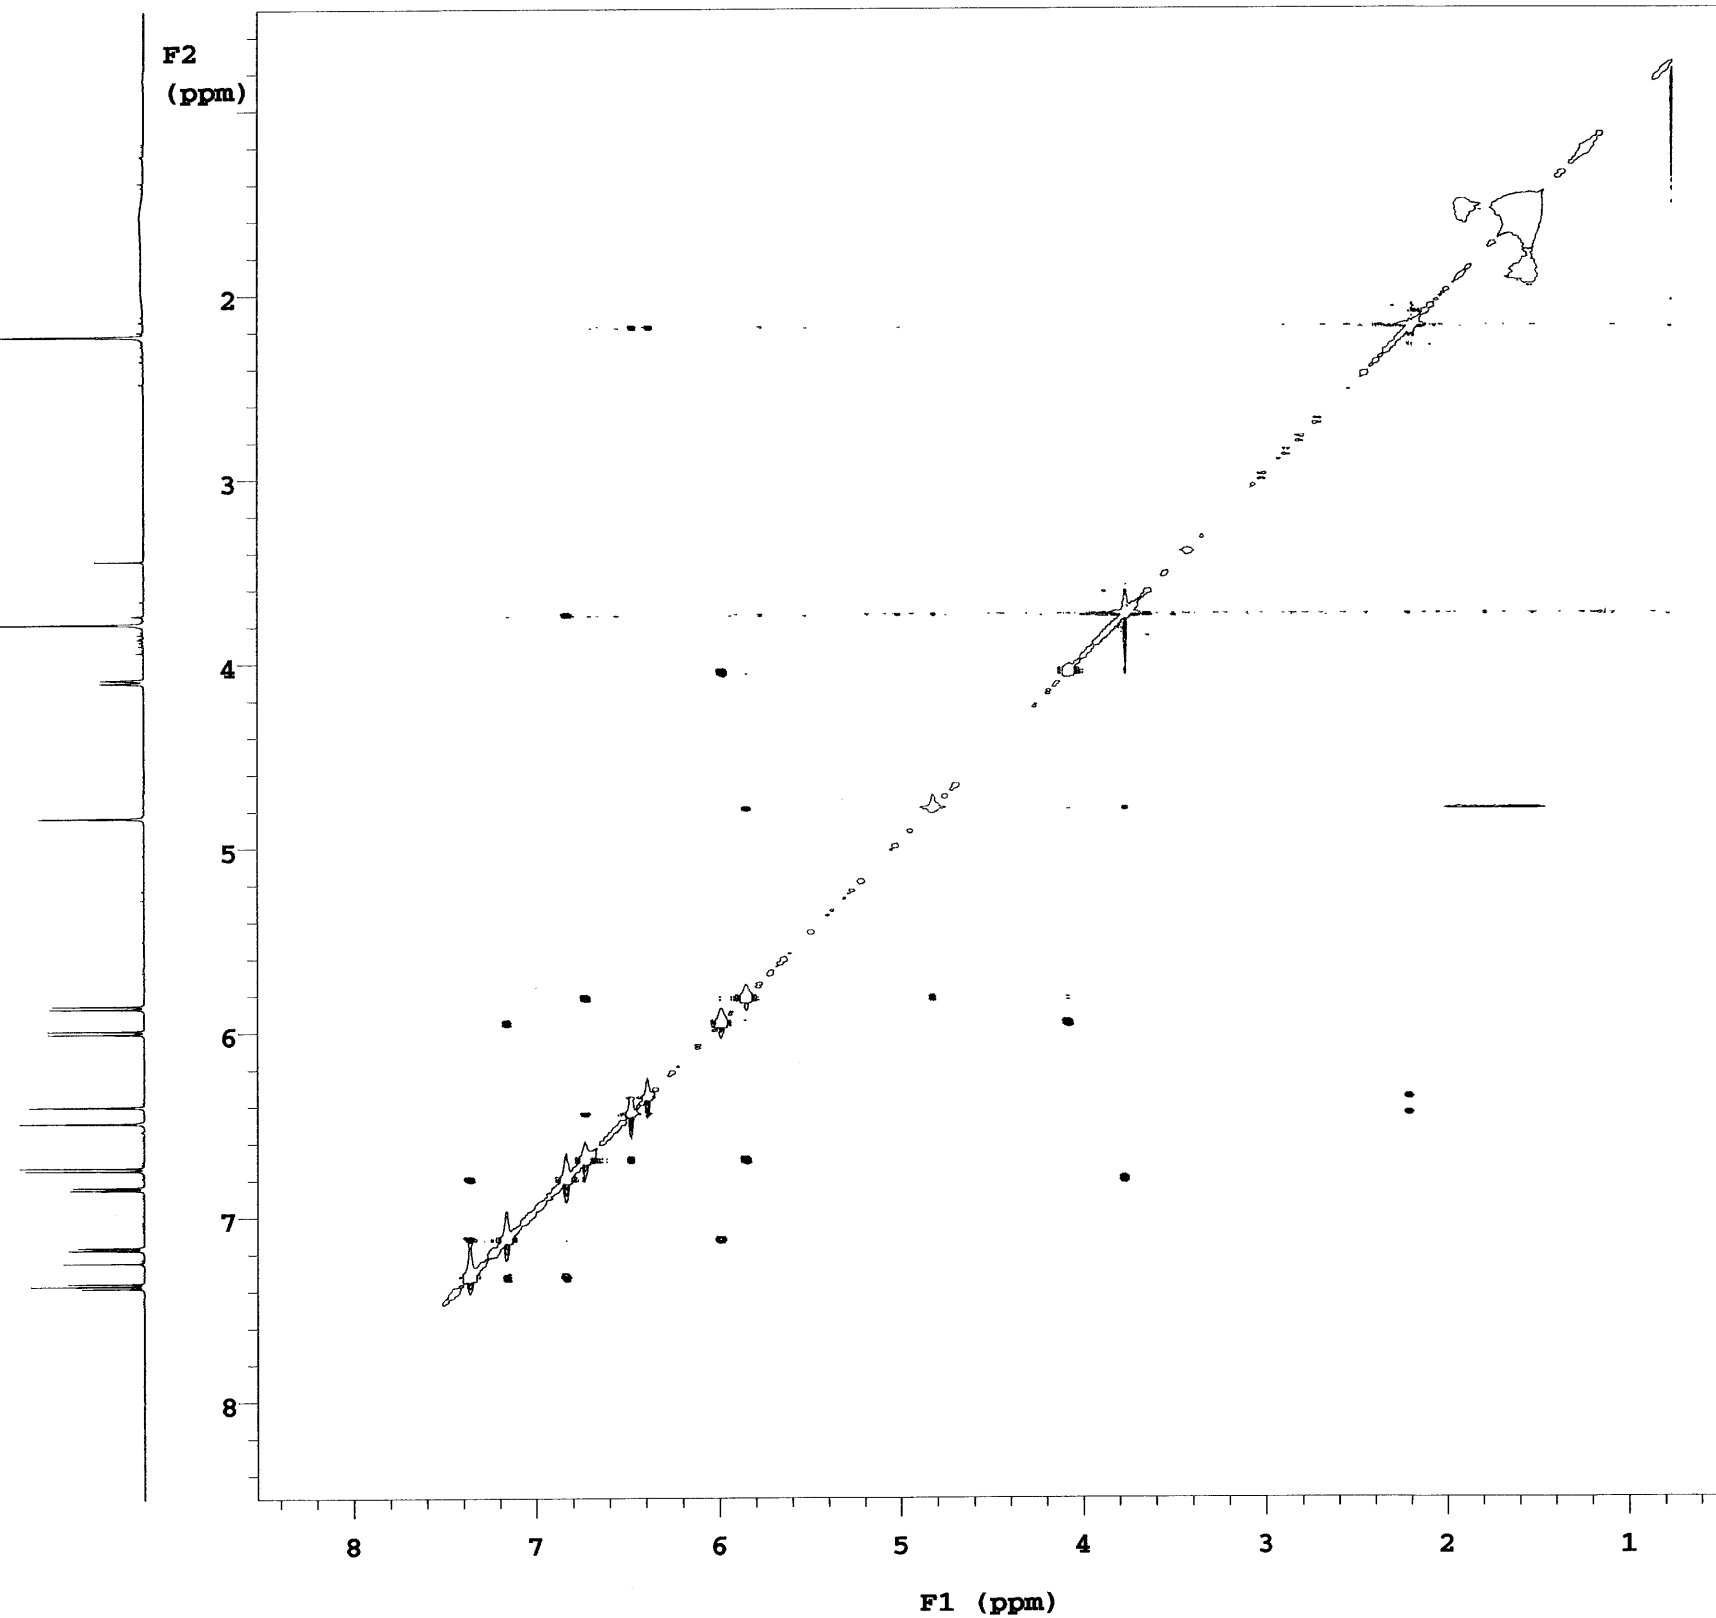

VS= 138  
H= 2

FILE=nmrdata: laatsch/zx047\_6noesy
