# Supplementary material for: Kiamycin, a Unique Cytotoxic Angucyclinone Derivative from a Marine Streptomyces sp
Source: MDPI journal article supplement (doi:10.3390/md10030551), 2012-02-27
Supplement: s1 [file s1]

ZX045 cdc13  
Xie / Laatsch / EP

Jun 29 2011

INSTRUMENT: MERCURY-300

PROBE atb

OBSERVE H1

Frequency 300.140 MHz

Spectral width 5109.9 Hz

Acquisition time 3.128 sec

Relaxation delay 0.000 sec

Pulse 45.0 degrees

Ambient temperature

32 repetitions

Gated decoupling

Double precision acquisition

DATA PROCESSING

FT size 65536

Total acquisition time 1 minutes

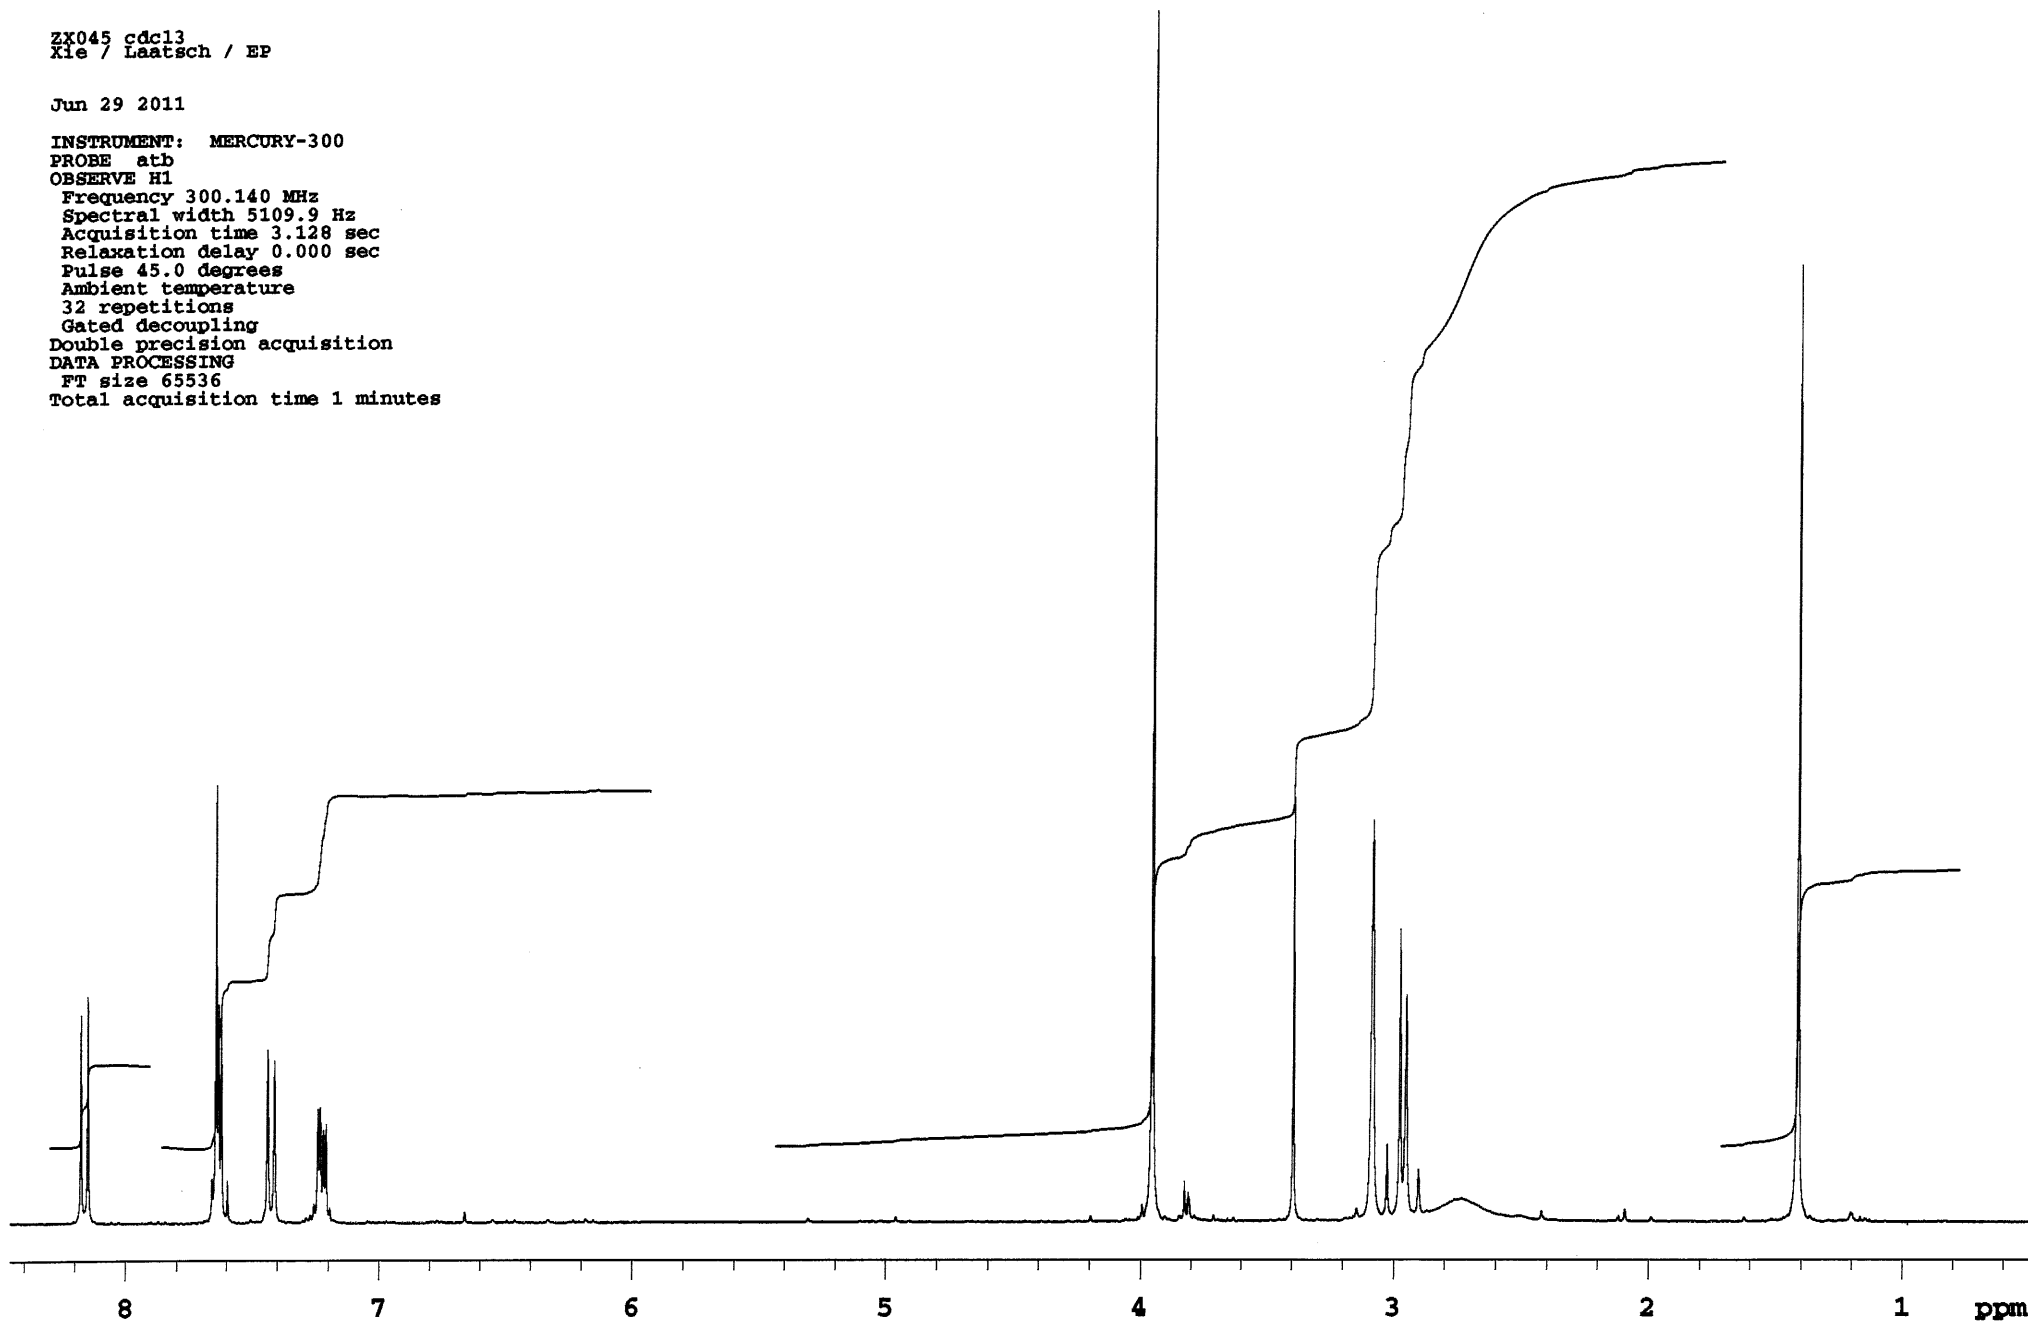

ZX045 cdc13  
Xie / Laatsch / EP

DATE: Jun 29 2011  
FILE:nmrdata: laatsch/zx045\_3h

ZX045 cdc13  
Xie / Laatsch / CS

SPECTRAL LINES FOR TH= 7.9  
FROM 17.7 PPM TO 217.7 PPM  
RFL= 11558.5 RFP= 9678.4

| INDEX | FREQ    | PPM    | HEIGHT |
|-------|---------|--------|--------|
| 1     | 24785.3 | 197.19 | 85.4   |
| 2     | 23197.6 | 184.56 | 71.6   |
| 3     | 22784.2 | 181.27 | 70.9   |
| 4     | 20071.8 | 159.69 | 90.1   |
| 5     | 18431.3 | 146.64 | 100.1  |
| 6     | 17287.1 | 137.53 | 83.7   |
| 7     | 17011.6 | 135.34 | 171.6  |
| 8     | 16966.3 | 134.98 | 71.7   |
| 9     | 16949.8 | 134.85 | 81.6   |
| 10    | 16851.6 | 134.07 | 79.6   |
| 11    | 16807.7 | 133.72 | 171.4  |
| 12    | 16324.5 | 129.88 | 166.5  |
| 13    | 15128.1 | 120.36 | 64.0   |
| 14    | 15014.6 | 119.45 | 175.3  |
| 15    | 14724.1 | 117.14 | 170.3  |
| 16    | 9710.3  | 77.25  | 181.8  |
| 17    | 9678.4  | 77.00  | 186.7  |
| 18    | 9646.5  | 76.75  | 183.8  |
| 19    | 9083.4  | 72.27  | 170.3  |
| 20    | 7086.0  | 56.38  | 200.0  |
| 21    | 6734.4  | 53.58  | 178.6  |
| 22    | 6352.5  | 50.54  | 24.6   |
| 23    | 5513.9  | 43.87  | 174.9  |
| 24    | 3735.1  | 29.72  | 188.4  |

ZX045 cdc13  
Xie / Laatsch / CS  
Jun 30 2011

INSTRUMENT INOVA-500  
PROBE coldc 3mm  
OBSERVE C13  
Frequency 125.707 MHz  
Spectral width 30120.5 Hz  
Acquisition time 2.125 sec  
Relaxation delay 0.000 sec  
Pulse width 36.0 degrees  
Temperature 27.0 deg. C / 300.1 K  
No. repetitions 640  
DECOUPLE H1  
Frequency 499.877 Mhz  
Power 32 dB  
Decoupler continuously on  
WALTZ-16 modulated  
Double precision acquisition  
DATA PROCESSING  
Line broadening 1.0 Hz  
FT size 262144  
Total acquisition time 22 minutes

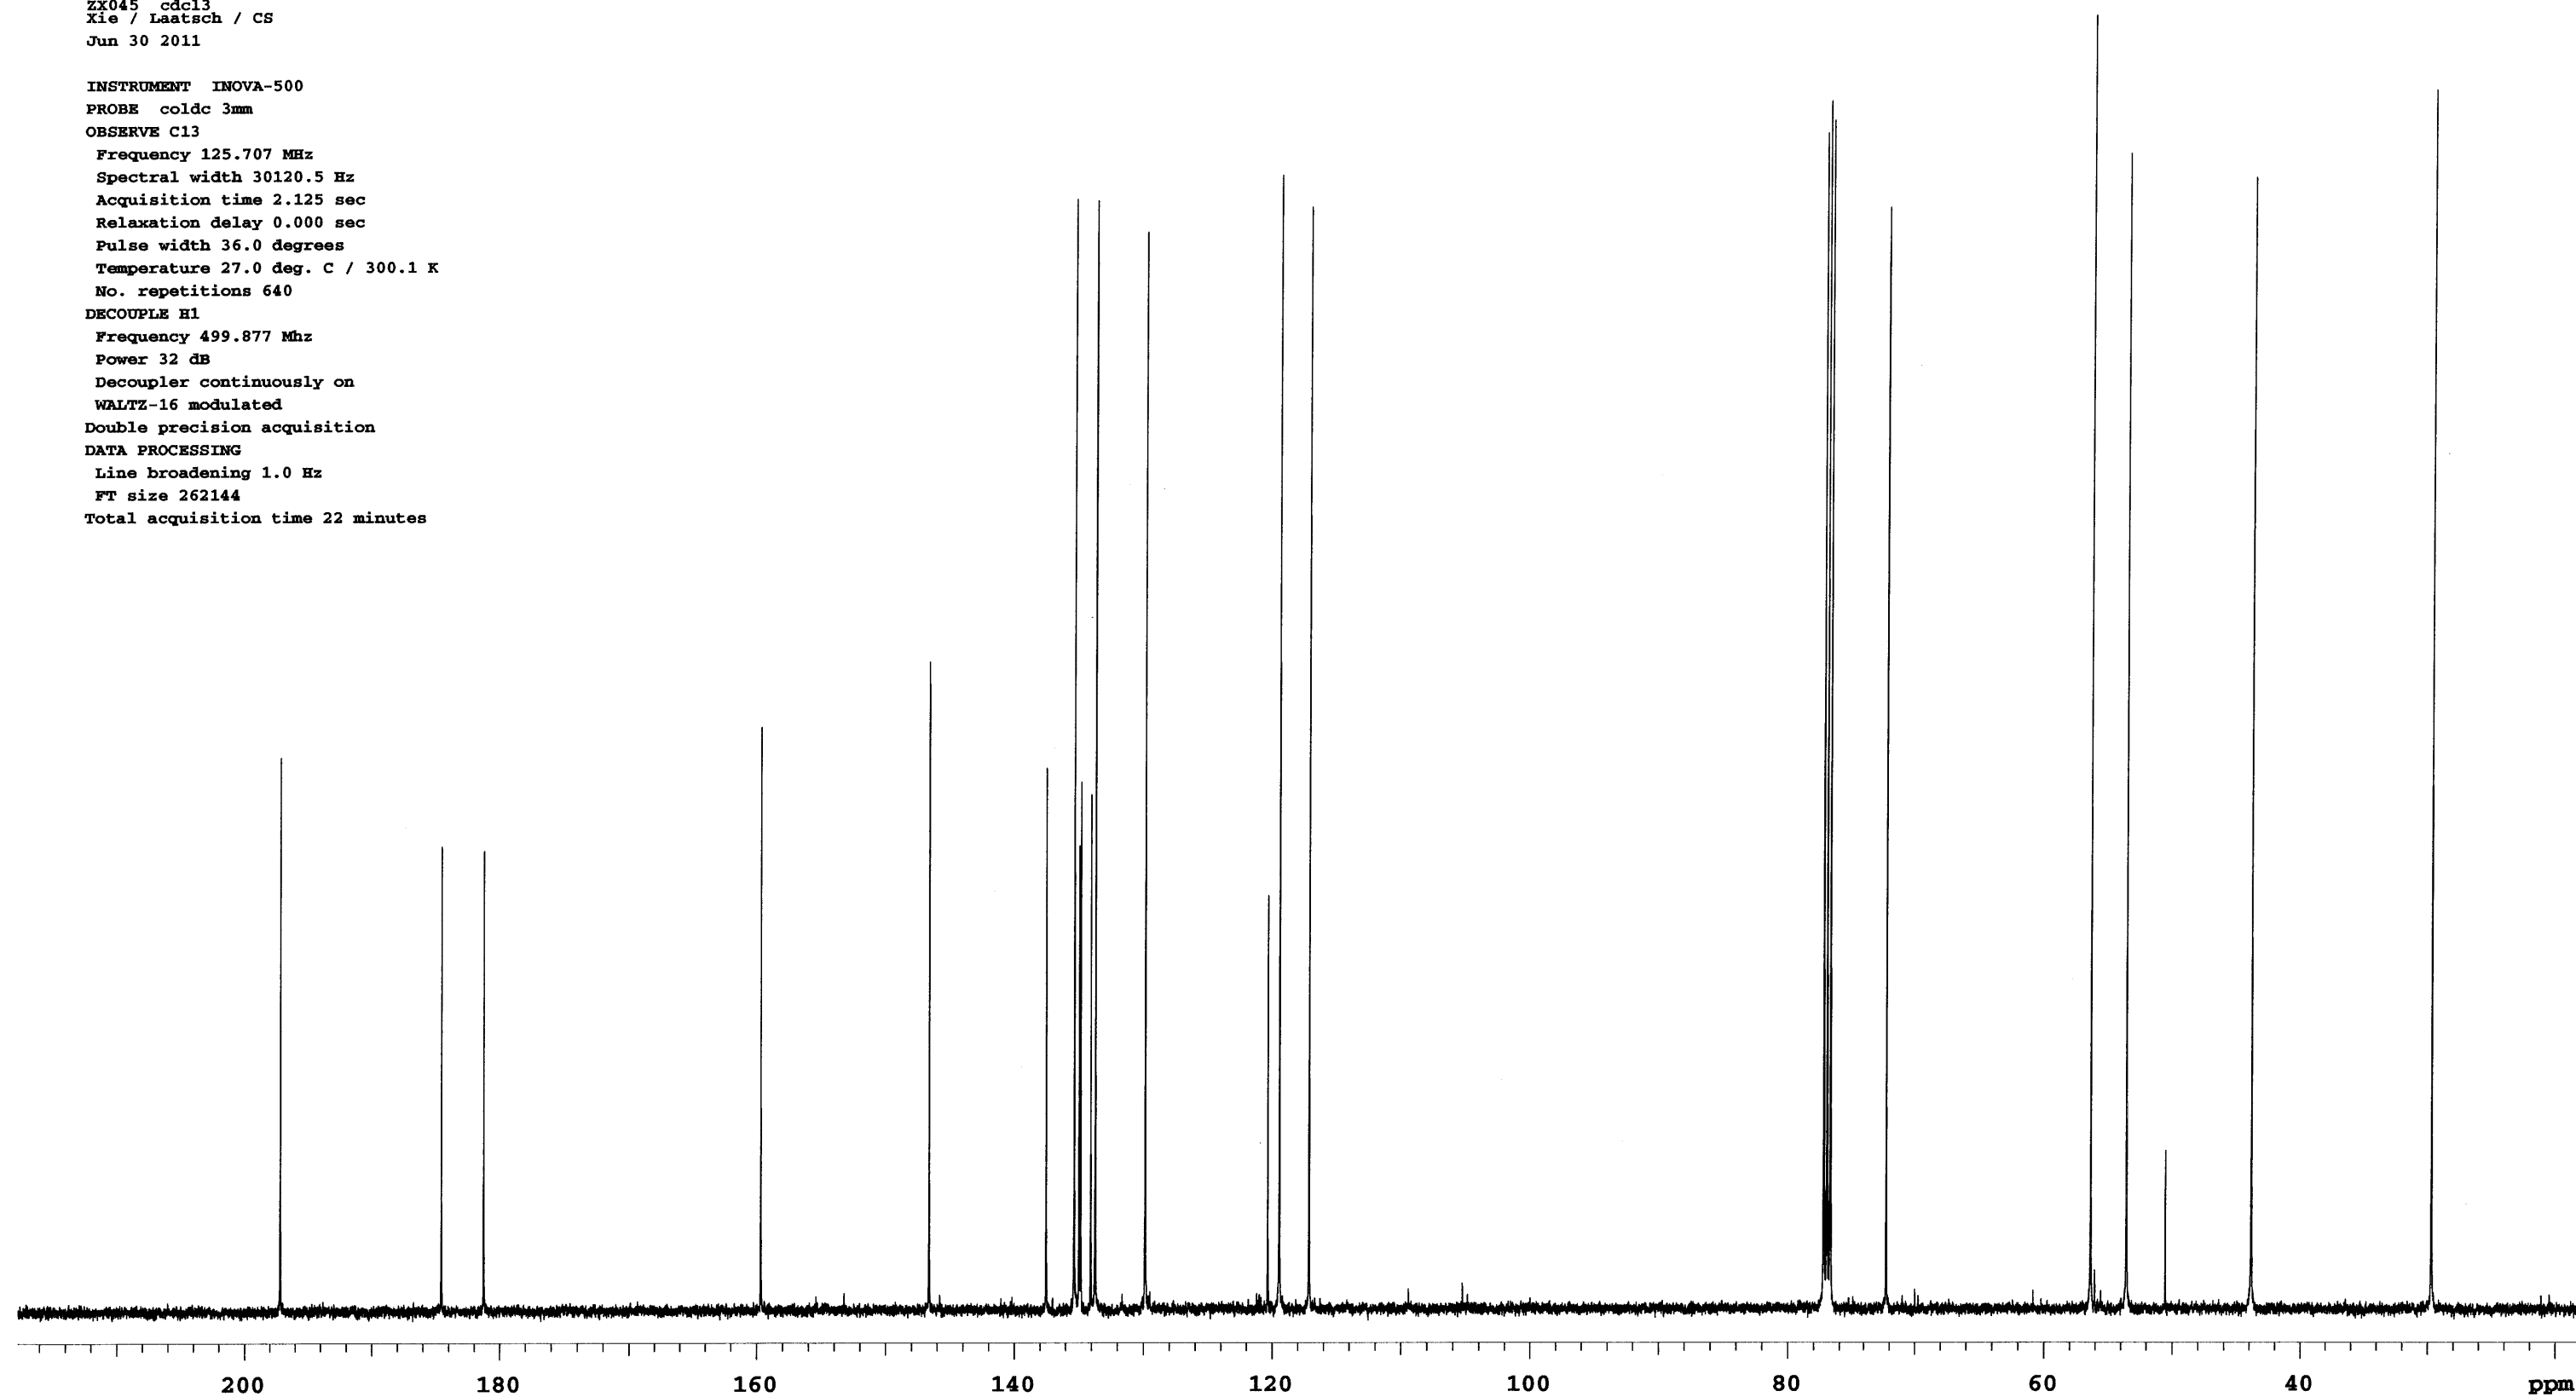

ZX045 cdc13  
Xie / Laatsch / CS

DATE: Jun 30 2011

FILE:nmrdast: laatsch/zx045\_5c

ZX045 cdc13  
Xie / Laatsch / CS  
Jun 30 2011

INSTRUMENT INOVA-500  
PROBE coldc 3mm  
Pulse sequence APT\_ad  
OBSERVE C13  
Frequency 125.707 MHz  
Spectral width 30165.9 Hz  
Acquisition time 2.122 sec  
Relaxation delay 2.000 sec  
Pulse width 90.0 degrees  
Temperature 27.0 deg. C / 300.1 K  
No. repetitions 160  
DECOUPLE H1  
Frequency 499.877 Mhz  
Power 32 dB  
Decoupler gated on during acquisition  
WALTZ-16 modulated  
Double precision acquisition  
DATA PROCESSING  
Line broadening 1.0 Hz  
FT size 262144  
Total acquisition time 11 minutes

APT - Spectrum : CH,CH3 up / C,CH2 down

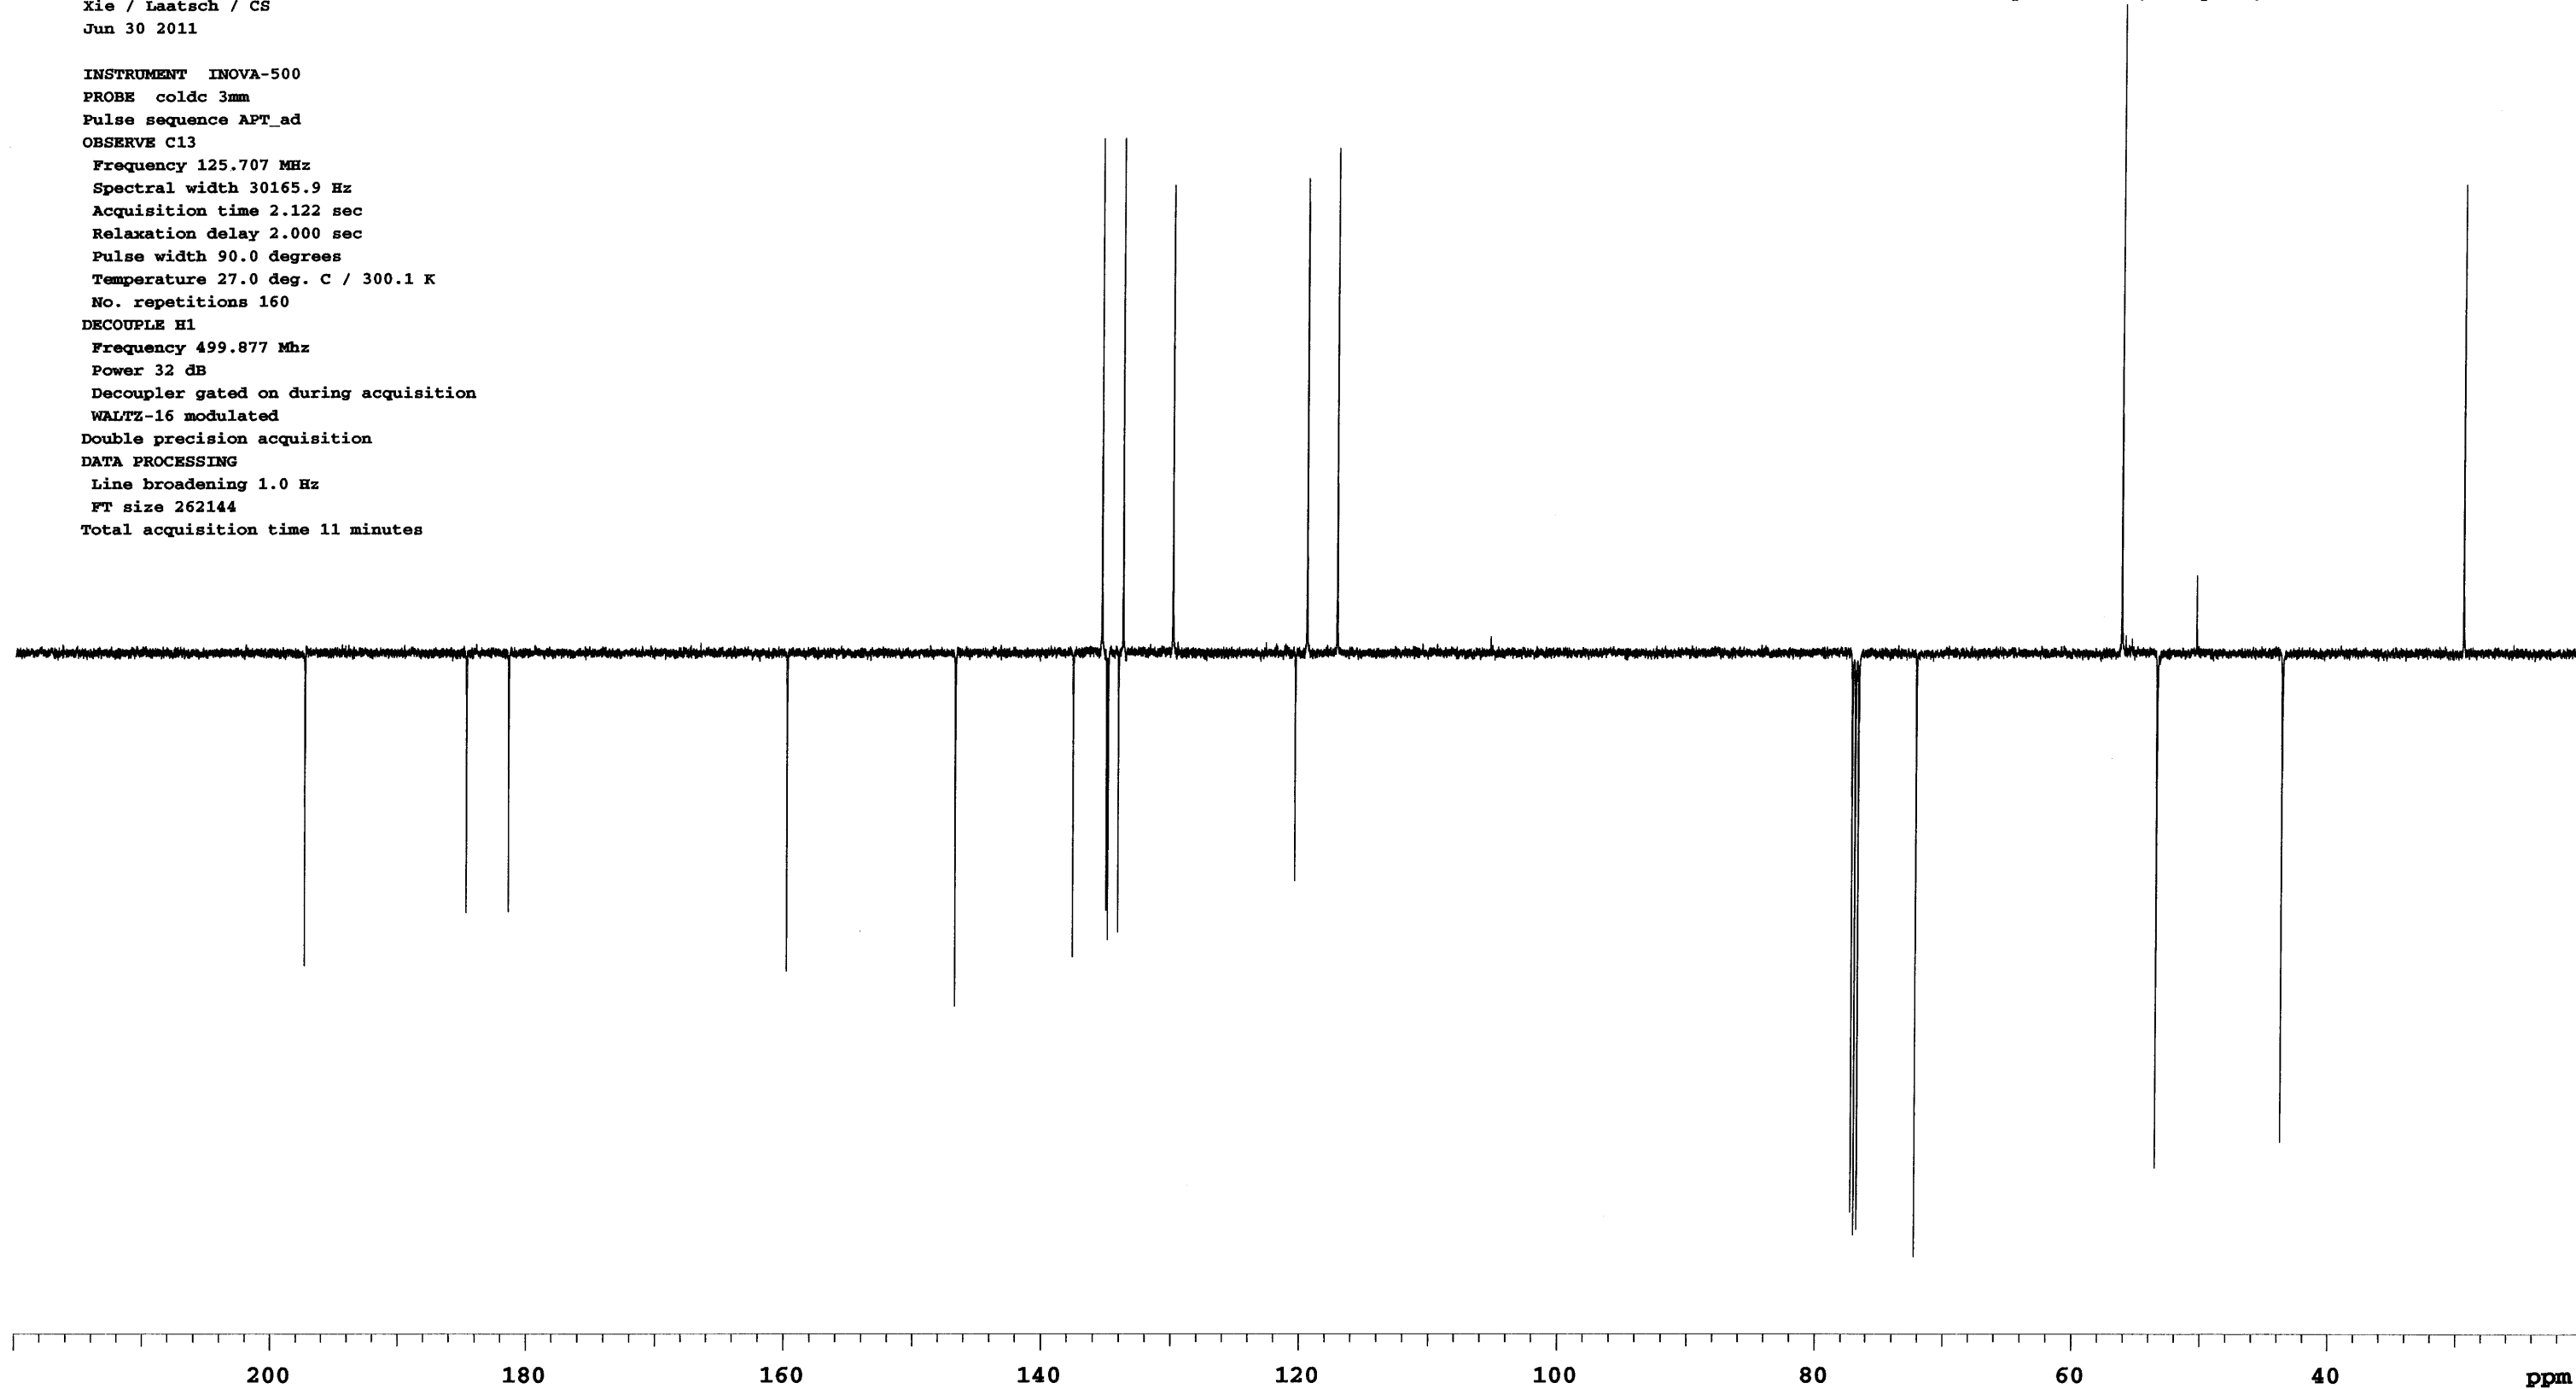

ZX045 cdc13  
Xie / Laatsch / CS

DATE: Jun 30 2011

FILE:nmrdest: laatsch/zx045\_5apt\_ad
