# Supplementary material for: Kiamycin, a Unique Cytotoxic Angucyclinone Derivative from a Marine Streptomyces sp
Source: MDPI journal article supplement (doi:10.3390/md10030551), 2012-02-27
Supplement: s1 [file s1]

ZX046 cdc13  
Xie / Laatsch / EP

Jun 29 2011

INSTRUMENT: MERCURY-300

PROBE atb

OBSERVE H1

Frequency 300.140 MHz

Spectral width 5109.9 Hz

Acquisition time 3.128 sec

Relaxation delay 0.000 sec

Pulse 45.0 degrees

Ambient temperature

48 repetitions

Gated decoupling

Double precision acquisition

DATA PROCESSING

FT size 65536

Total acquisition time 2 minutes

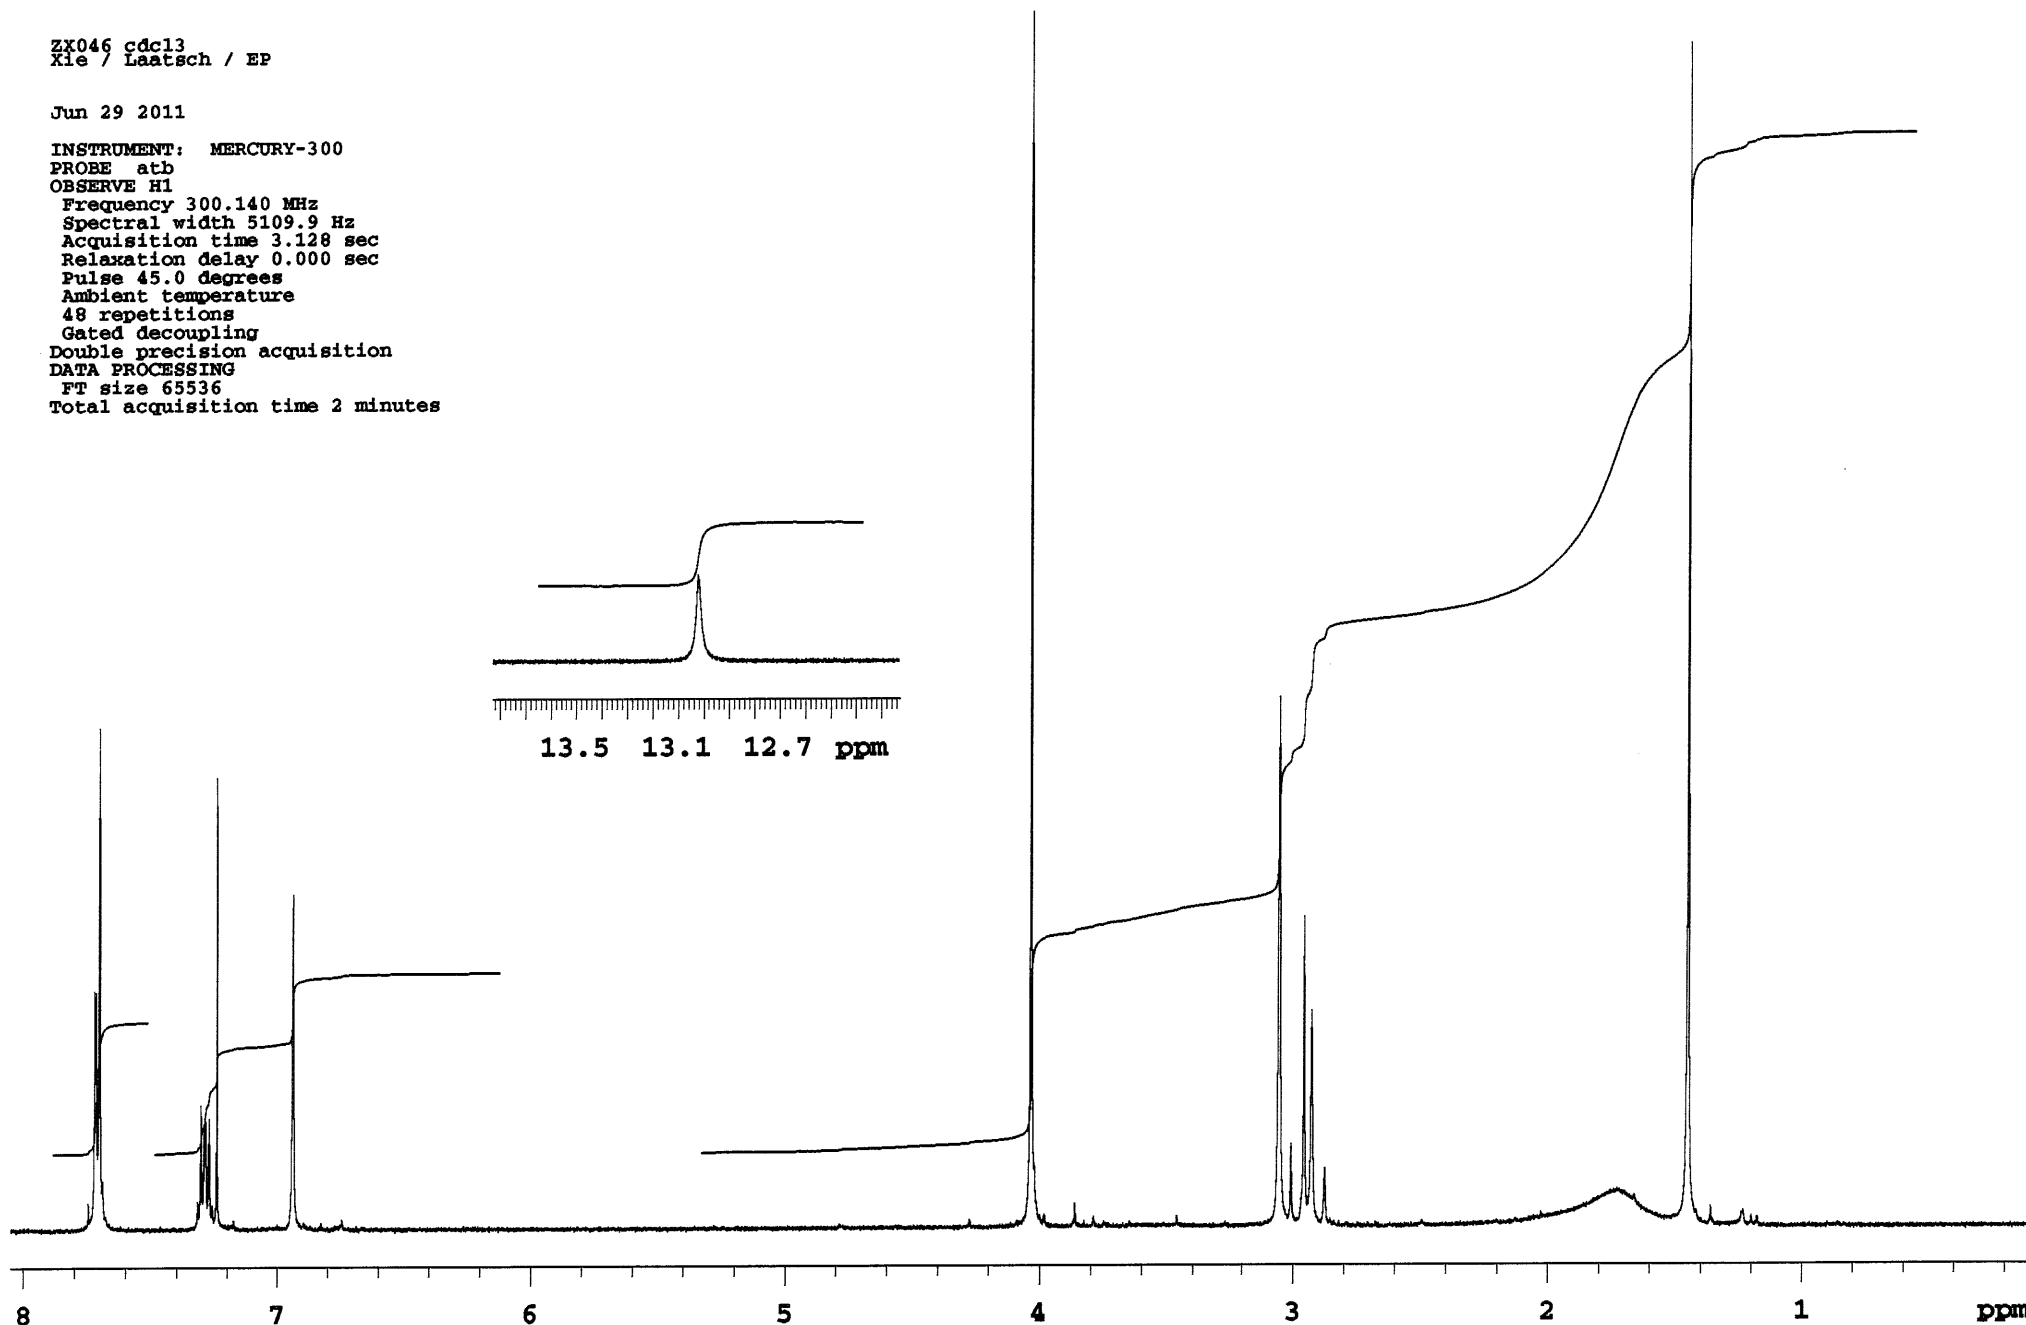

ZX046 cdc13

Xie / Laatsch / EP

DATE: Jun 29 2011

FILE:nmrdata: laatsch/zx046\_3h

zx046 cdcl3  
Xie/Laatsch

SPECTRAL LINES FOR TH= 6.9  
FROM 11.4 PPM TO 211.4 PPM  
RFL= 11549.8 RFP= 9678.4

| INDEX | FREQ    | PPM    | HEIGHT |
|-------|---------|--------|--------|
| 1     | 24605.6 | 195.76 | 16.4   |
| 2     | 23665.0 | 188.28 | 14.0   |
| 3     | 23209.1 | 184.65 | 13.3   |
| 4     | 20600.2 | 163.89 | 21.1   |
| 5     | 20145.1 | 160.27 | 16.6   |
| 6     | 18783.8 | 149.44 | 19.3   |
| 7     | 17316.3 | 137.77 | 17.0   |
| 8     | 17298.8 | 137.63 | 12.8   |
| 9     | 17140.0 | 136.36 | 37.2   |
| 10    | 15965.1 | 127.02 | 13.5   |
| 11    | 15309.7 | 121.80 | 35.3   |
| 12    | 15069.1 | 119.89 | 38.0   |
| 13    | 15037.8 | 119.64 | 11.2   |
| 14    | 14799.1 | 117.74 | 12.3   |
| 15    | 14755.4 | 117.39 | 36.6   |
| 16    | 9710.3  | 77.25  | 195.6  |
| 17    | 9678.4  | 77.00  | 200.0  |
| 18    | 9646.5  | 76.75  | 198.1  |
| 19    | 9051.3  | 72.01  | 30.1   |
| 20    | 7112.0  | 56.58  | 37.8   |
| 21    | 6752.1  | 53.72  | 38.9   |
| 22    | 5547.5  | 44.14  | 38.7   |
| 23    | 3743.8  | 29.79  | 38.2   |

zx046 cdc13  
Xie/Laatsch  
Jul 5 2011

INSTRUMENT INOVA-500  
PROBE coldc 3mm  
OBSERVE C13  
Frequency 125.707 MHz  
Spectral width 30120.5 Hz  
Acquisition time 2.125 sec  
Relaxation delay 0.000 sec  
Pulse width 36.0 degrees  
Temperature 27.0 deg. C / 300.1 K  
No. repetitions 464

DECOUPLE H1  
Frequency 499.877 Mhz  
Power 32 dB  
Decoupler continuously on  
WALTZ-16 modulated

Double precision acquisition

DATA PROCESSING

Line broadening 1.0 Hz

FT size 262144

Total acquisition time 16 minutes

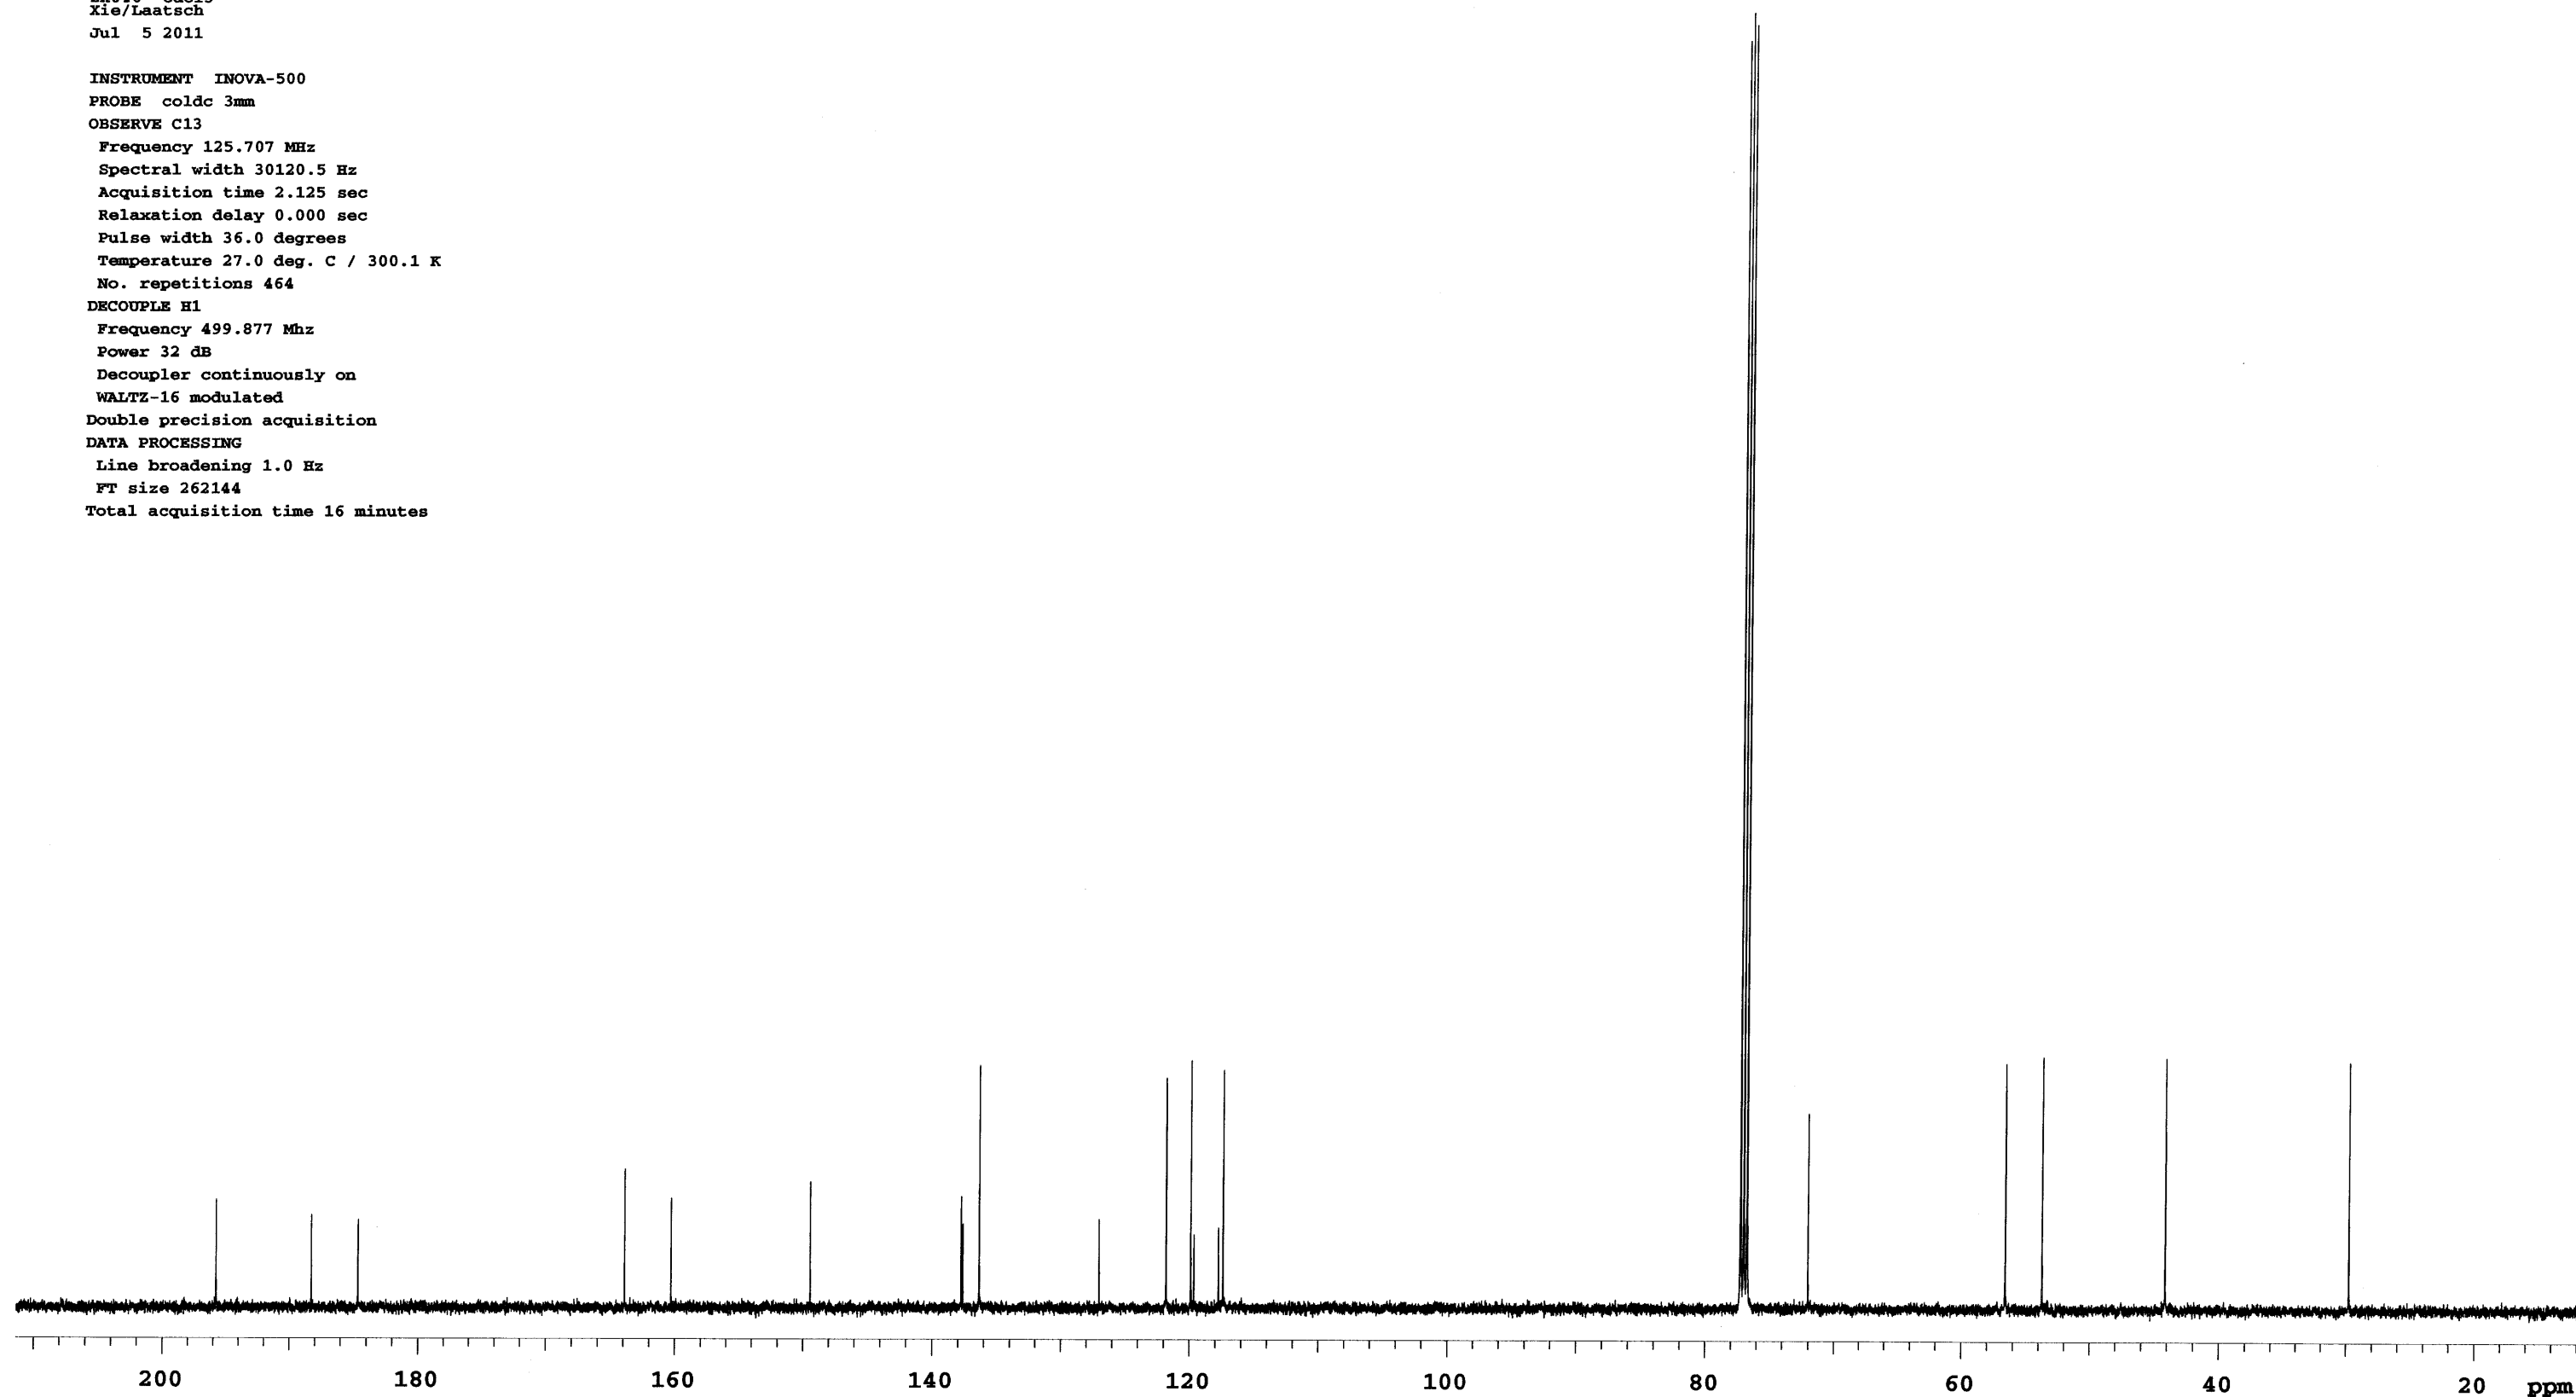

zx046 cdc13  
Xie/Laatsch

DATE: Jul 5 2011

FILE:nmrdest: laatsch/zx046\_5c

zx046 cdcl3  
Xie/Laatsch  
Jul 5 2011

APT - Spectrum : CH,CH3 up / C,CH2 down

INSTRUMENT INOVA-500  
PROBE coldc 3mm  
Pulse sequence APT\_ad  
OBSERVE C13  
Frequency 125.707 MHz  
Spectral width 30165.9 Hz  
Acquisition time 2.122 sec  
Relaxation delay 2.000 sec  
Pulse width 90.0 degrees  
Temperature 27.0 deg. C / 300.1 K  
No. repetitions 112  
DECOUPLE H1  
Frequency 499.877 Mhz  
Power 32 dB  
Decoupler gated on during acquisition  
WALTZ-16 modulated  
Double precision acquisition  
DATA PROCESSING  
Line broadening 1.0 Hz  
FT size 262144  
Total acquisition time 8 minutes

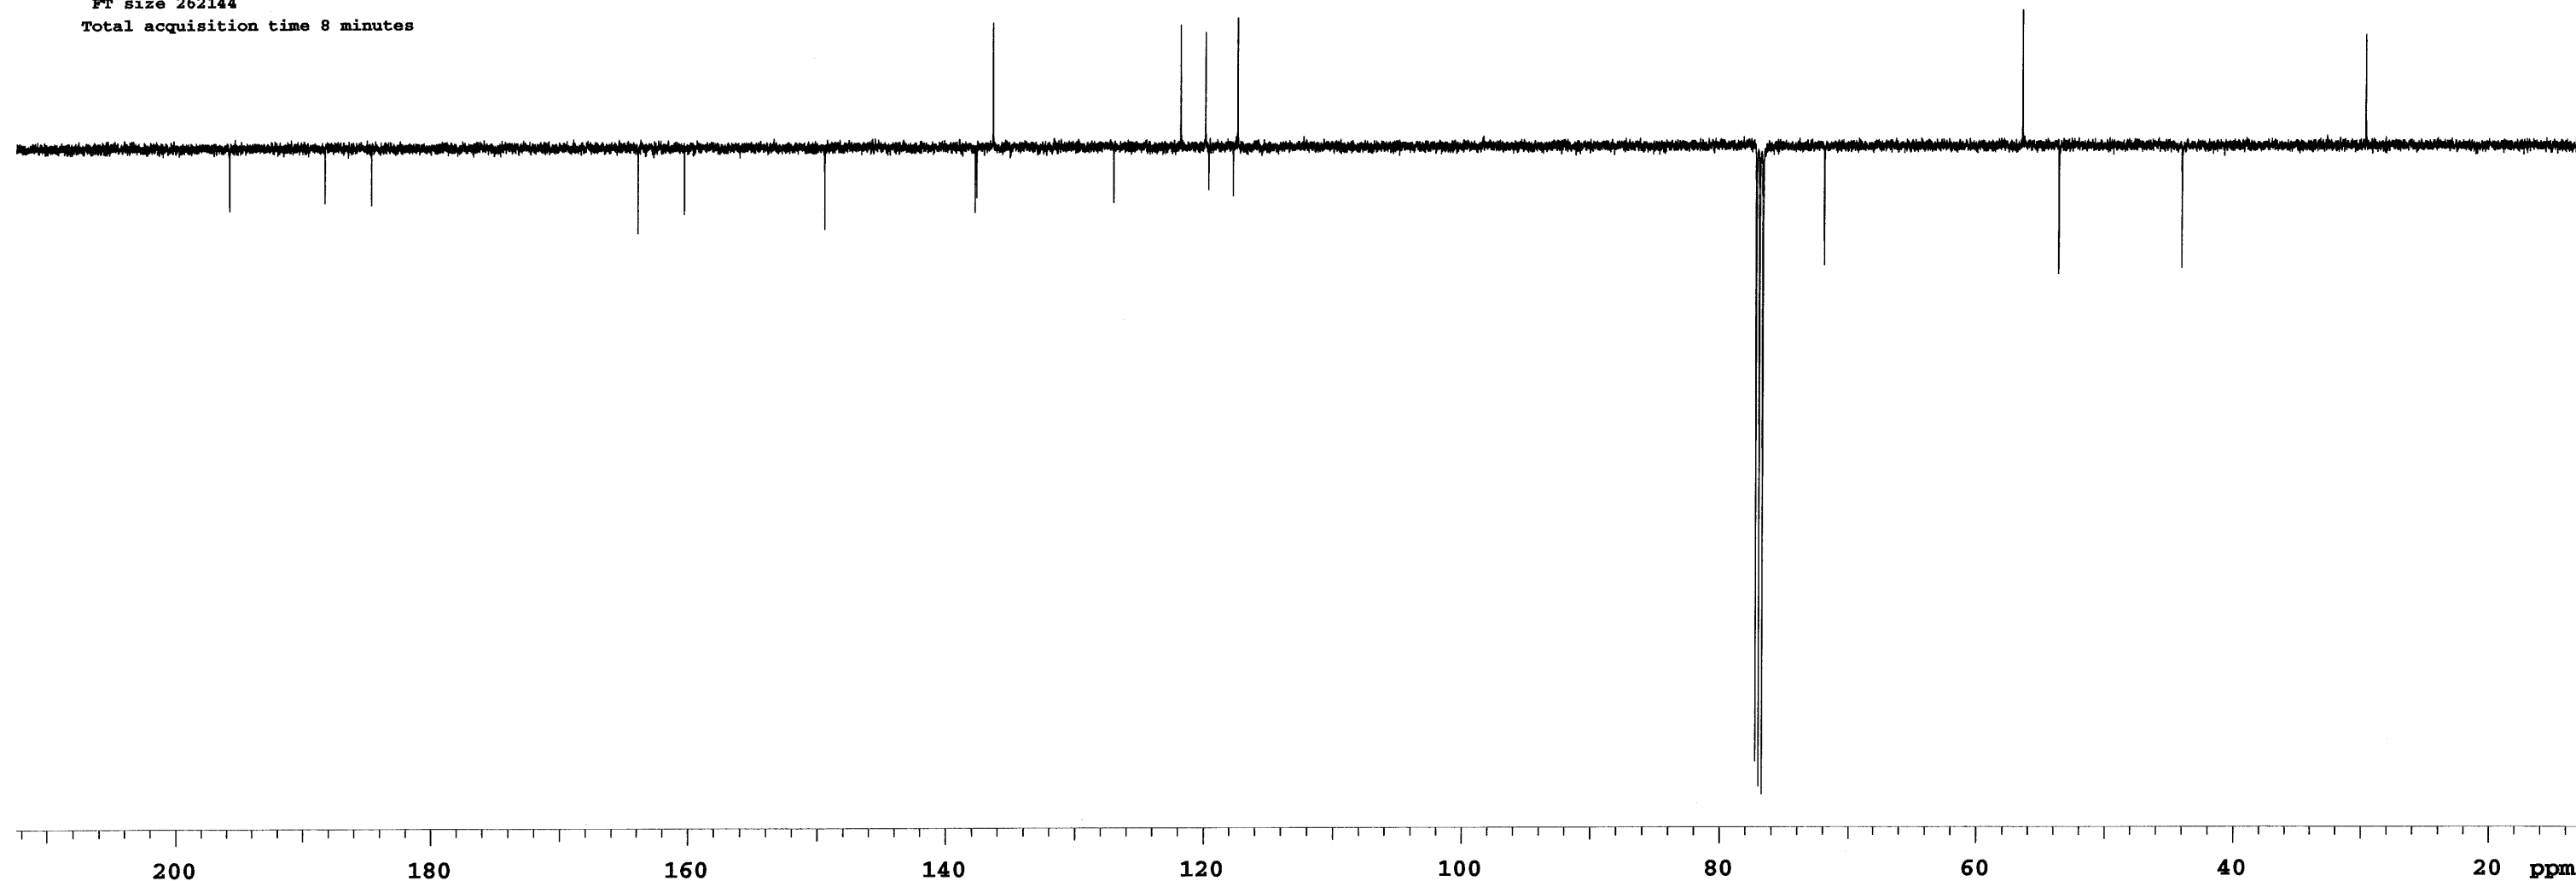

zx046 cdcl3  
Xie/Laatsch

DATE: Jul 5 2011

FILE:nmrdast: laatsch/zx046\_5apt\_ad
